# Supplementary material
Source: publisher figshare collection journal article supplement (https://karger.figshare.com/articles/dataset/_/5120383)

## Figure legends:

Figures S1–S21:

Relative bias of naive (solid lines) and conditional (dashed lines) estimates  $\hat{\Psi}_1$  and  $\hat{\Psi}_2$  calculated from 100 samples being significant at level  $\alpha$  simulated under a MOI with allele frequency  $p$ . The size of the sample was 200 (dot symbol), 400 (square symbol), or 800 (diamond symbol) families.

Figure S1: MOI=MUL,  $p = .5$ ,  $\alpha = .05$

Figure S2: MOI=MUL,  $p = .5$ ,  $\alpha = 10^{-3}$

Figure S3: MOI=MUL,  $p = .5$ ,  $\alpha = 10^{-6}$

Figure S4: MOI=ADD,  $p = .2$ ,  $\alpha = .05$

Figure S5: MOI=ADD,  $p = .2$ ,  $\alpha = 10^{-3}$

Figure S6: MOI=ADD,  $p = .2$ ,  $\alpha = 10^{-6}$

Figure S7: MOI=ADD,  $p = .5$ ,  $\alpha = .05$

Figure S8: MOI=ADD,  $p = .5$ ,  $\alpha = 10^{-3}$

Figure S9: MOI=ADD,  $p = .5$ ,  $\alpha = 10^{-6}$

Figure S10: MOI=REC,  $p = .2$ ,  $\alpha = .05$

Figure S11: MOI=REC,  $p = .2$ ,  $\alpha = 10^{-3}$

Figure S12: MOI=REC,  $p = .2$ ,  $\alpha = 10^{-6}$

Figure S13: MOI=REC,  $p = .5$ ,  $\alpha = .05$

Figure S14: MOI=REC,  $p = .5$ ,  $\alpha = 10^{-3}$

Figure S15: MOI=REC,  $p = .5$ ,  $\alpha = 10^{-6}$

Figure S16: MOI=DOM,  $p = .2$ ,  $\alpha = .05$

Figure S17: MOI=DOM,  $p = .2$ ,  $\alpha = 10^{-3}$

Figure S18: MOI=DOM,  $p = .2$ ,  $\alpha = 10^{-6}$

Figure S19: MOI=DOM,  $p = .5$ ,  $\alpha = .05$

Figure S20: MOI=DOM,  $p = .5$ ,  $\alpha = 10^{-3}$

Figure S21: MOI=DOM,  $p = .5$ ,  $\alpha = 10^{-6}$

Fig. S1.—

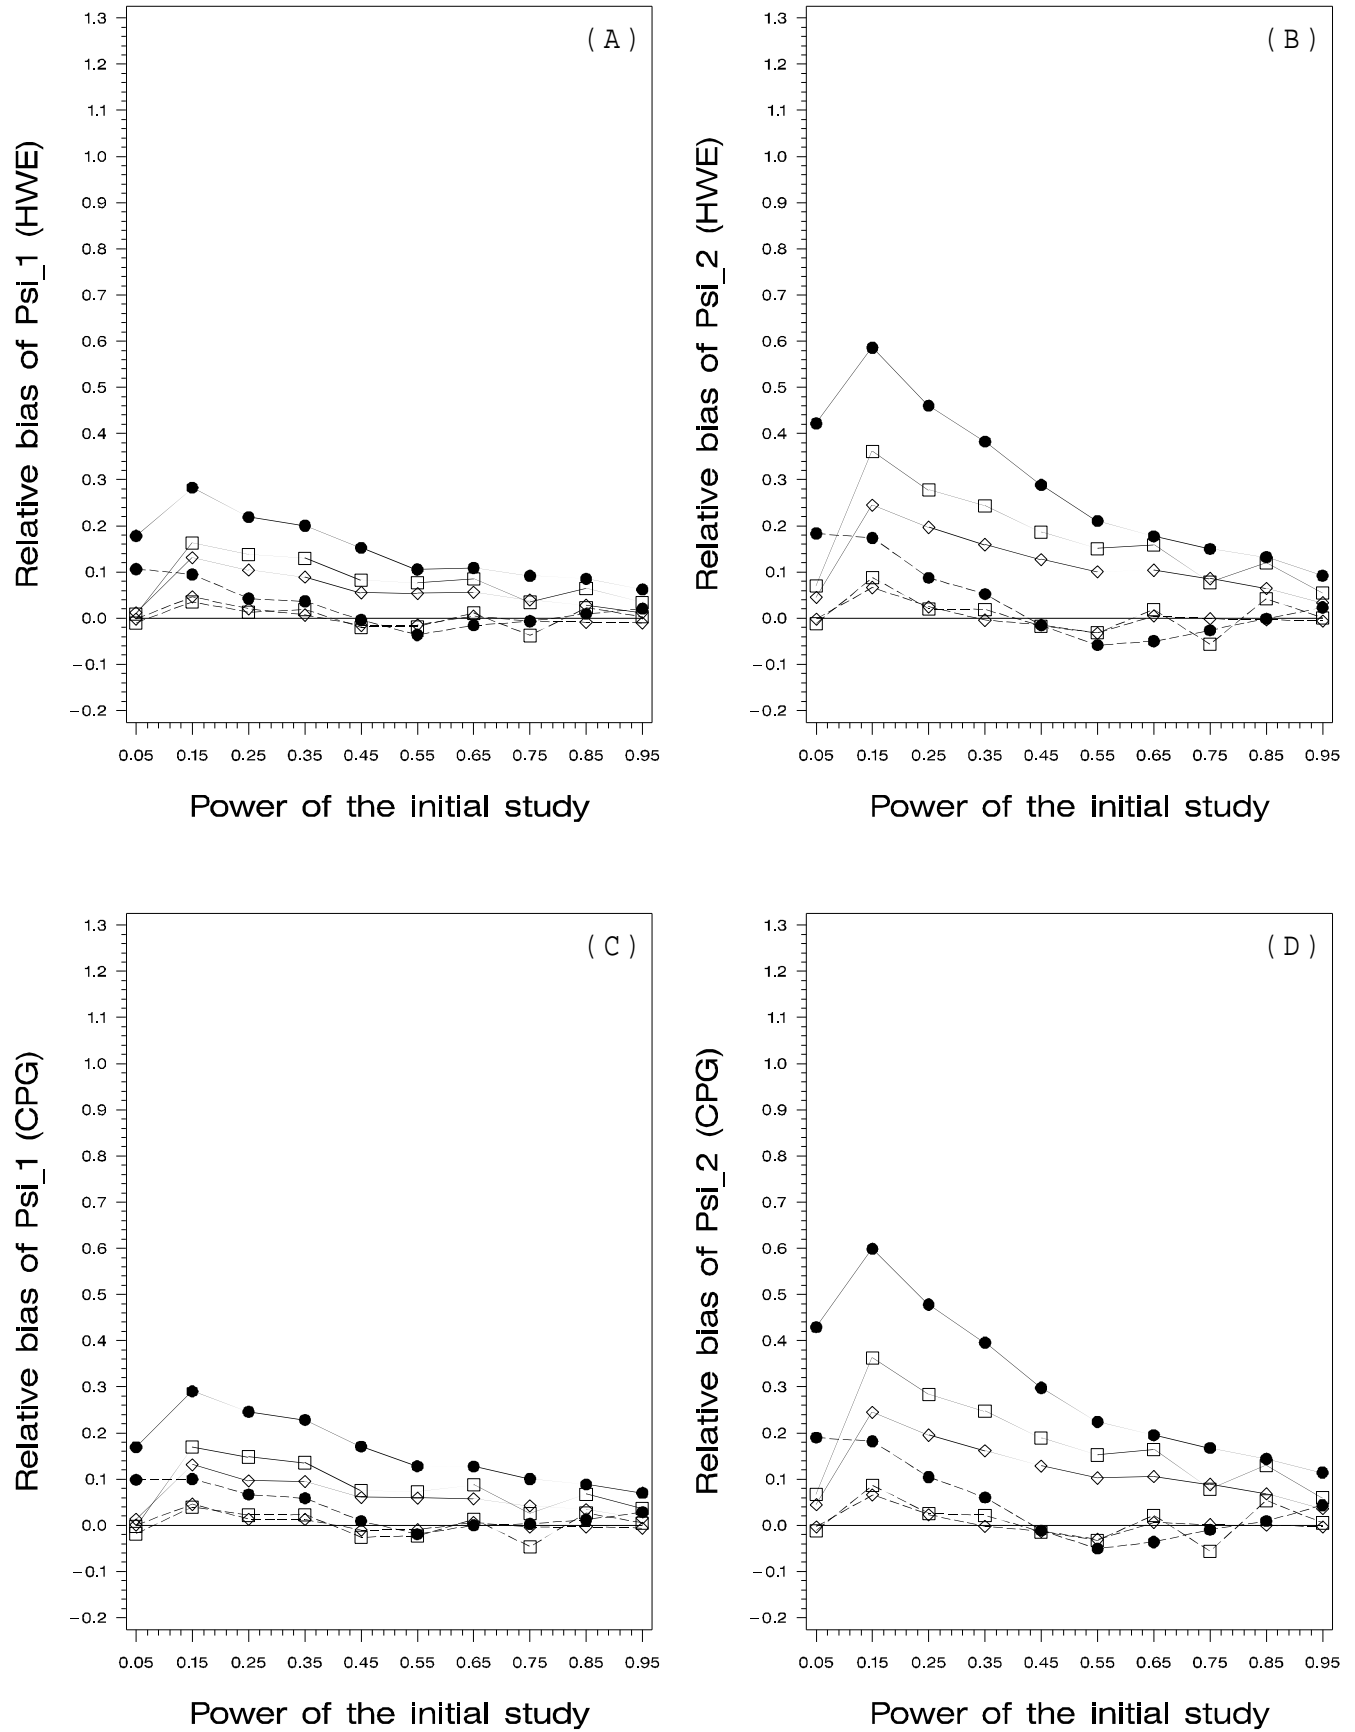

Fig. S2.—

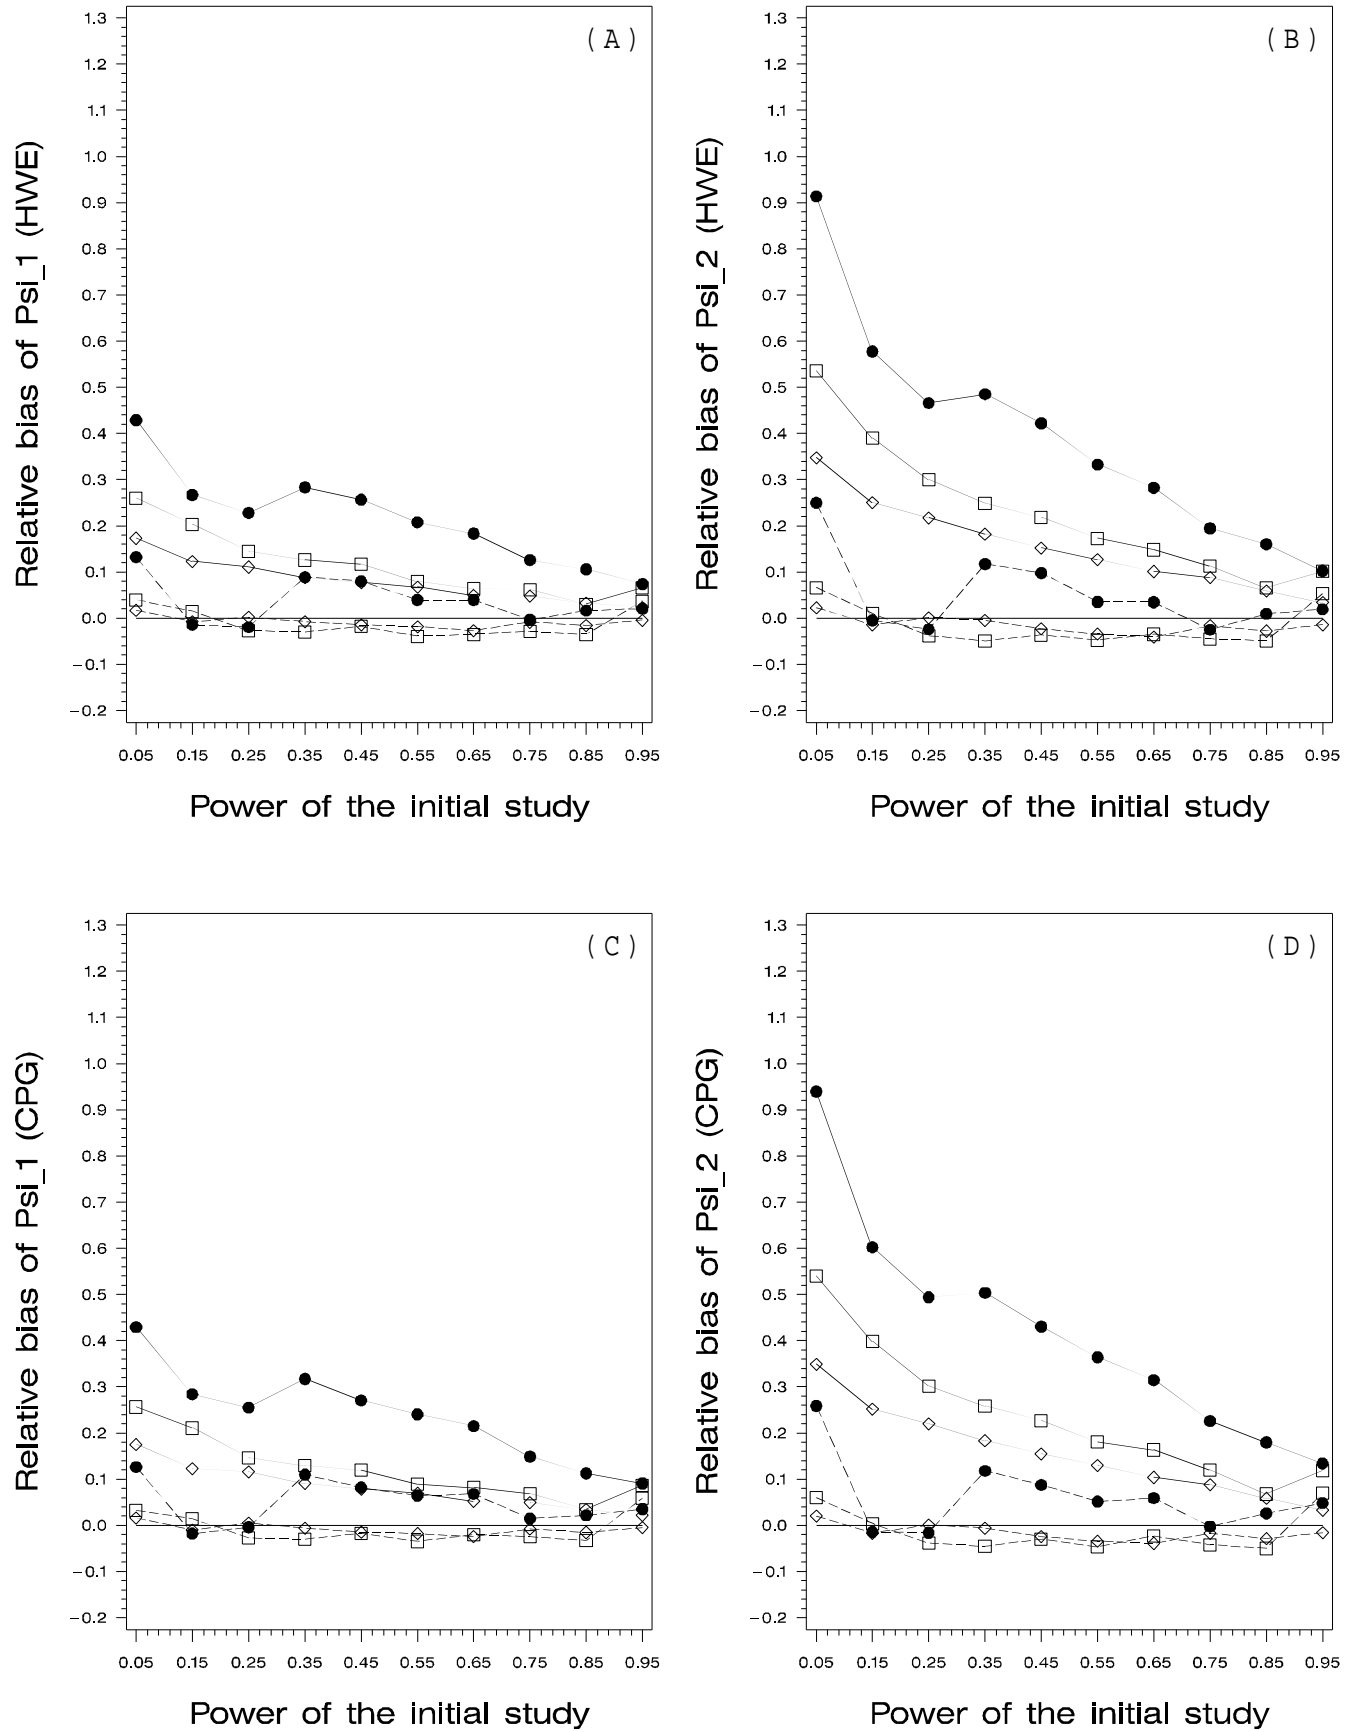

Fig. S3.—

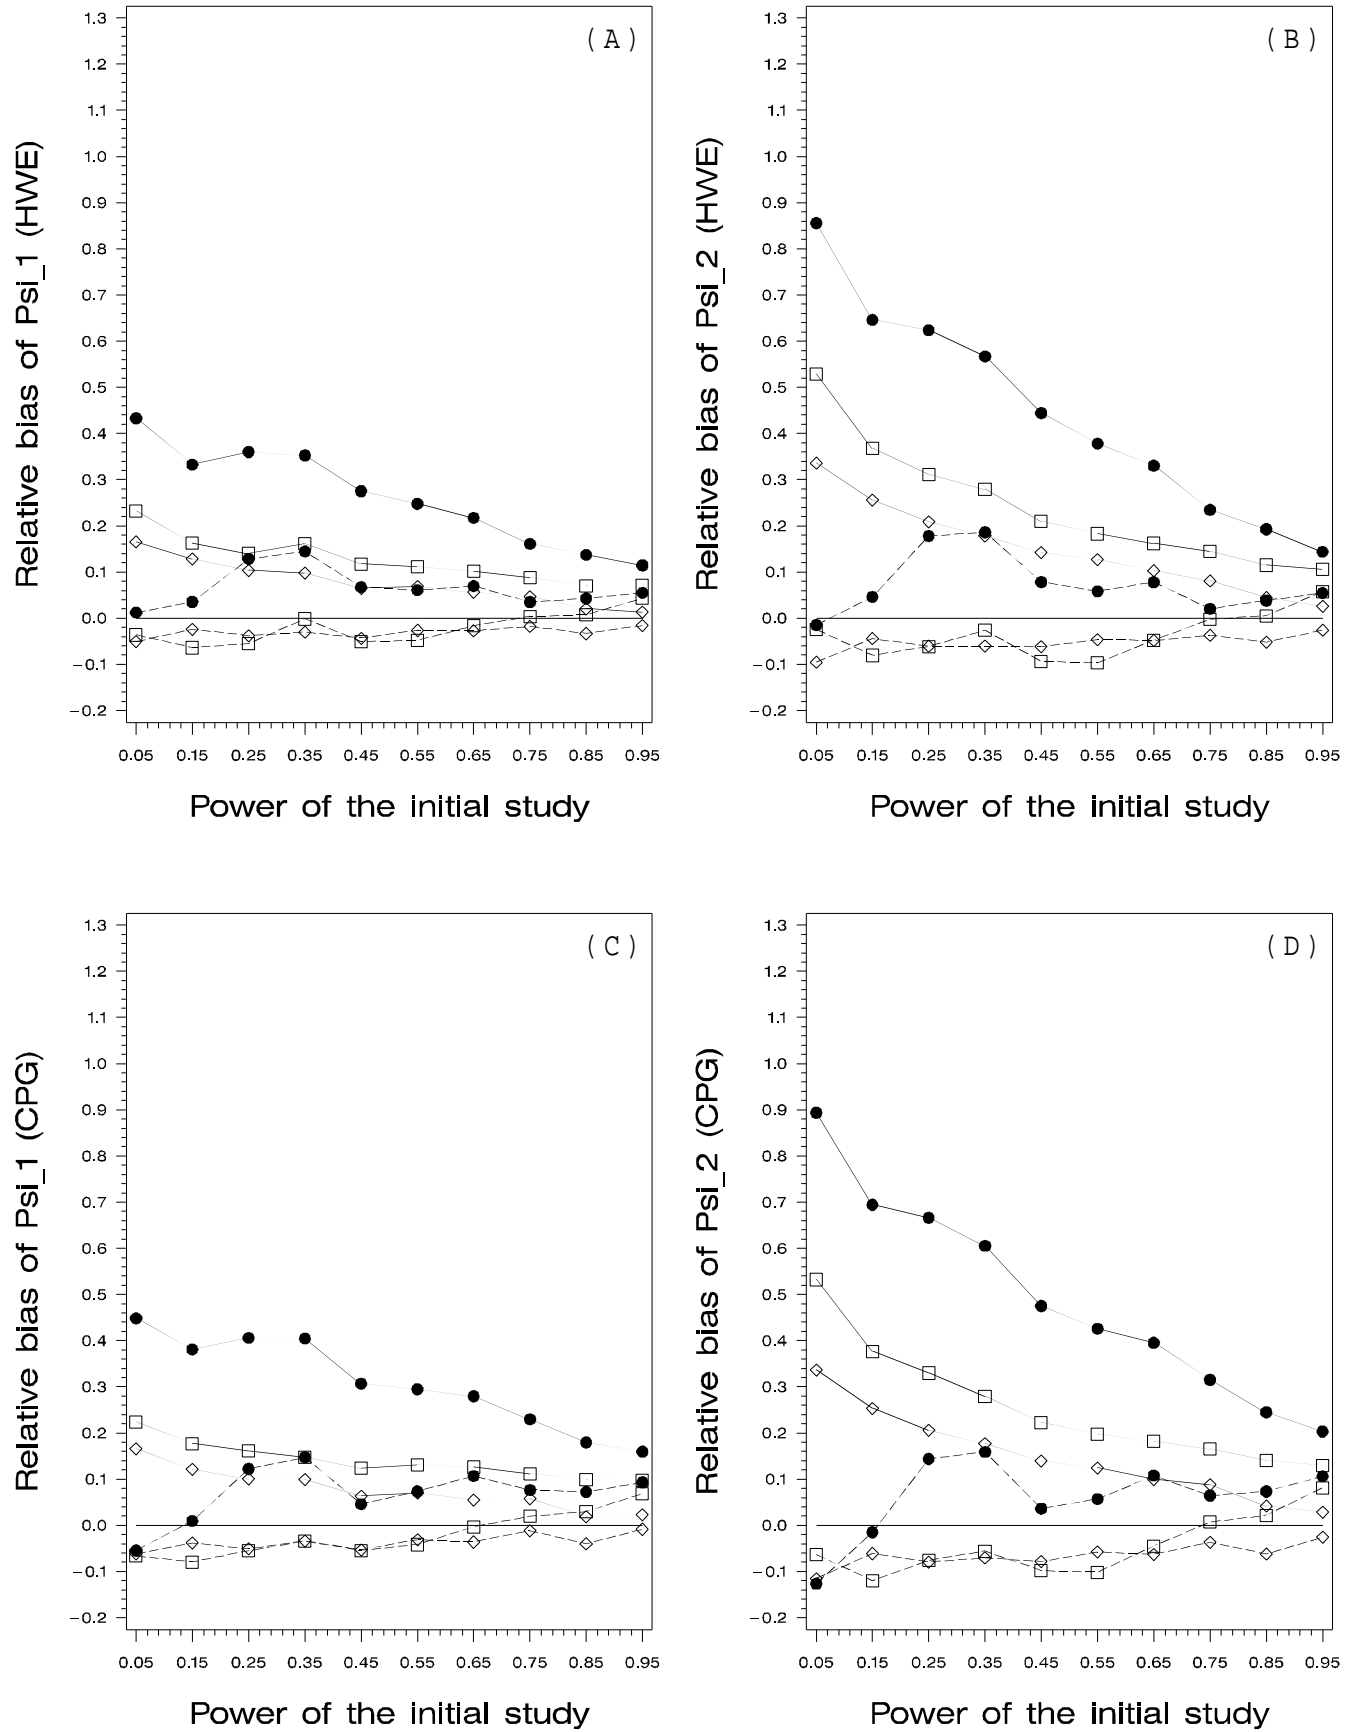

Fig. S4.—

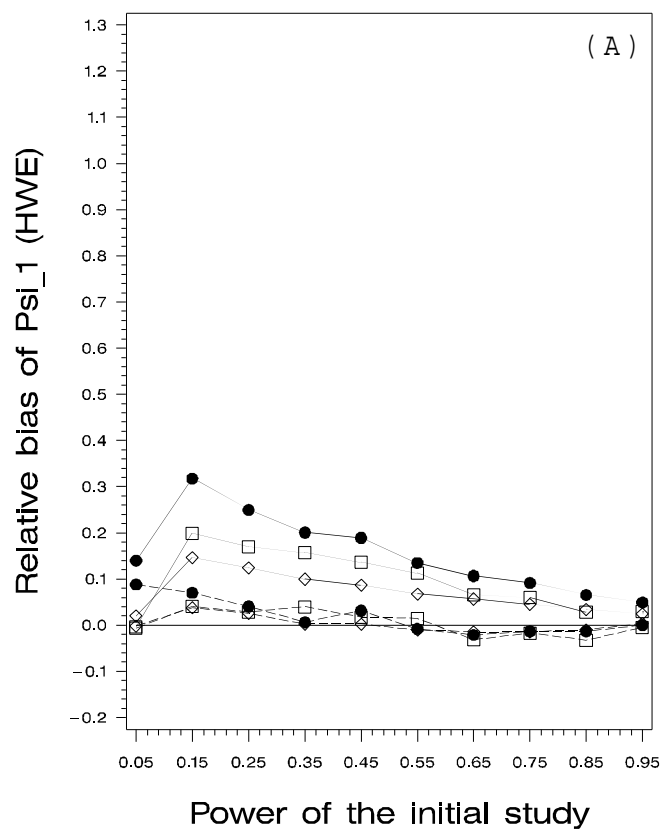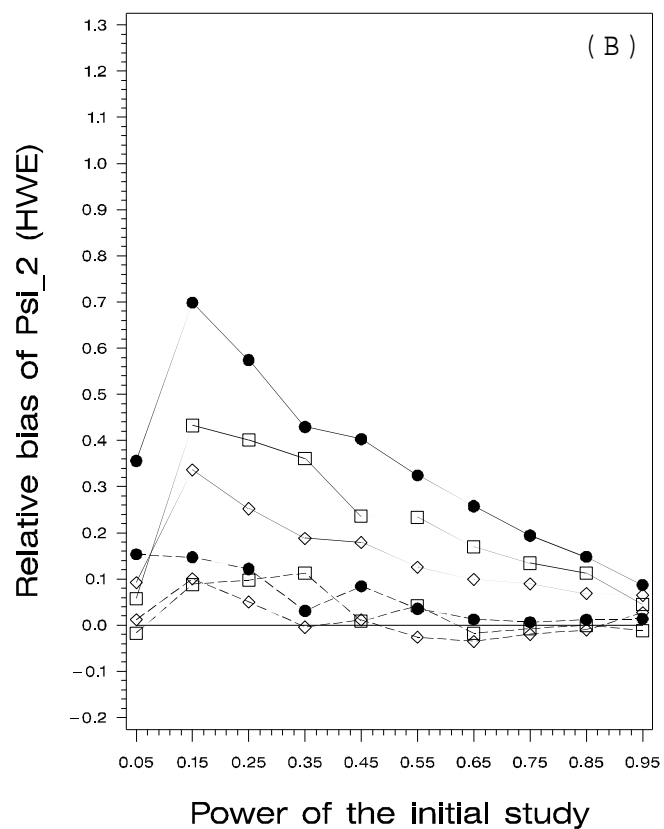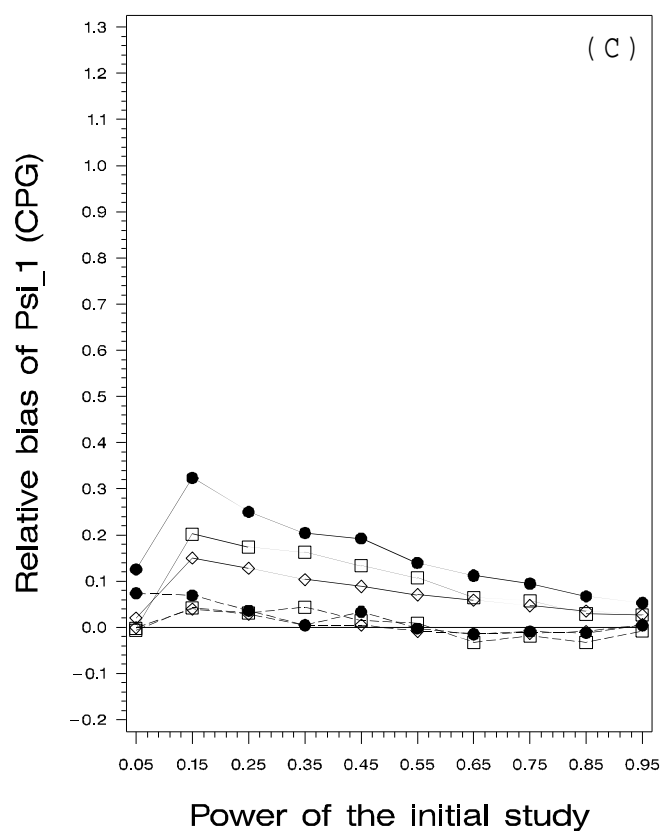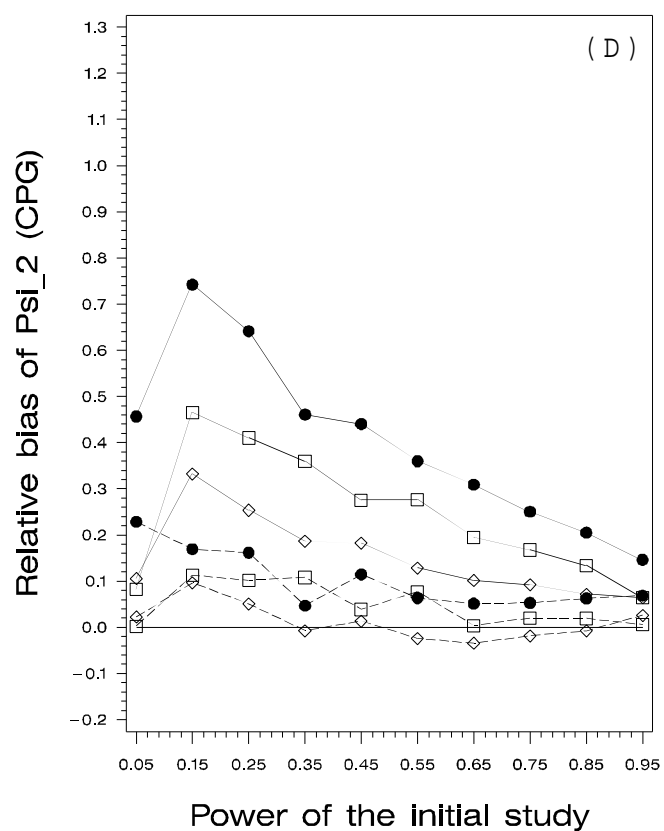

Fig. S5.—

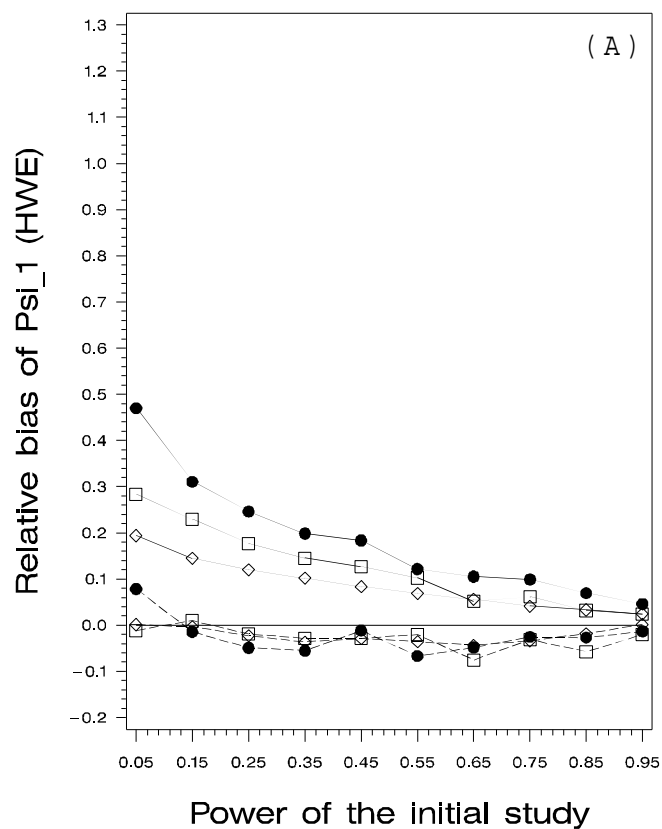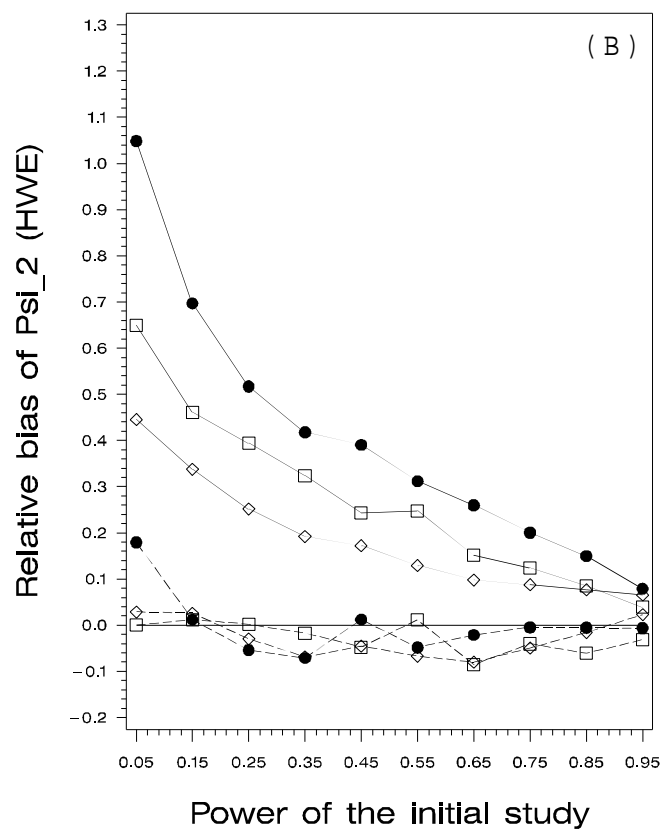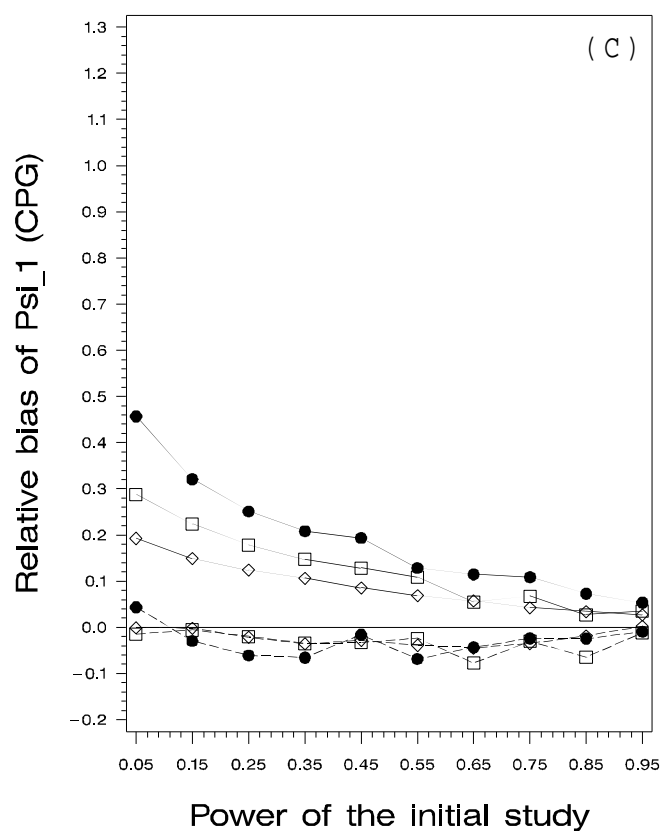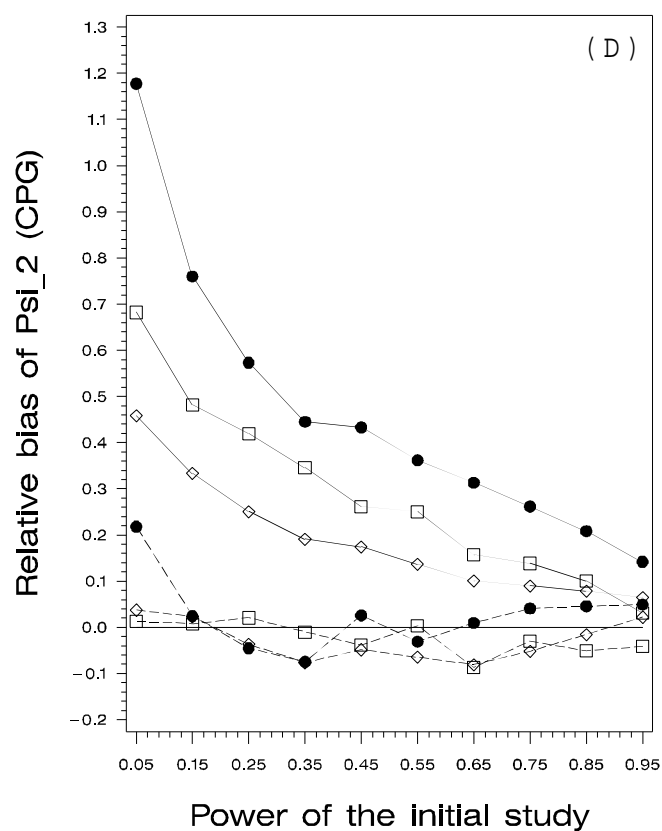

Fig. S6.—

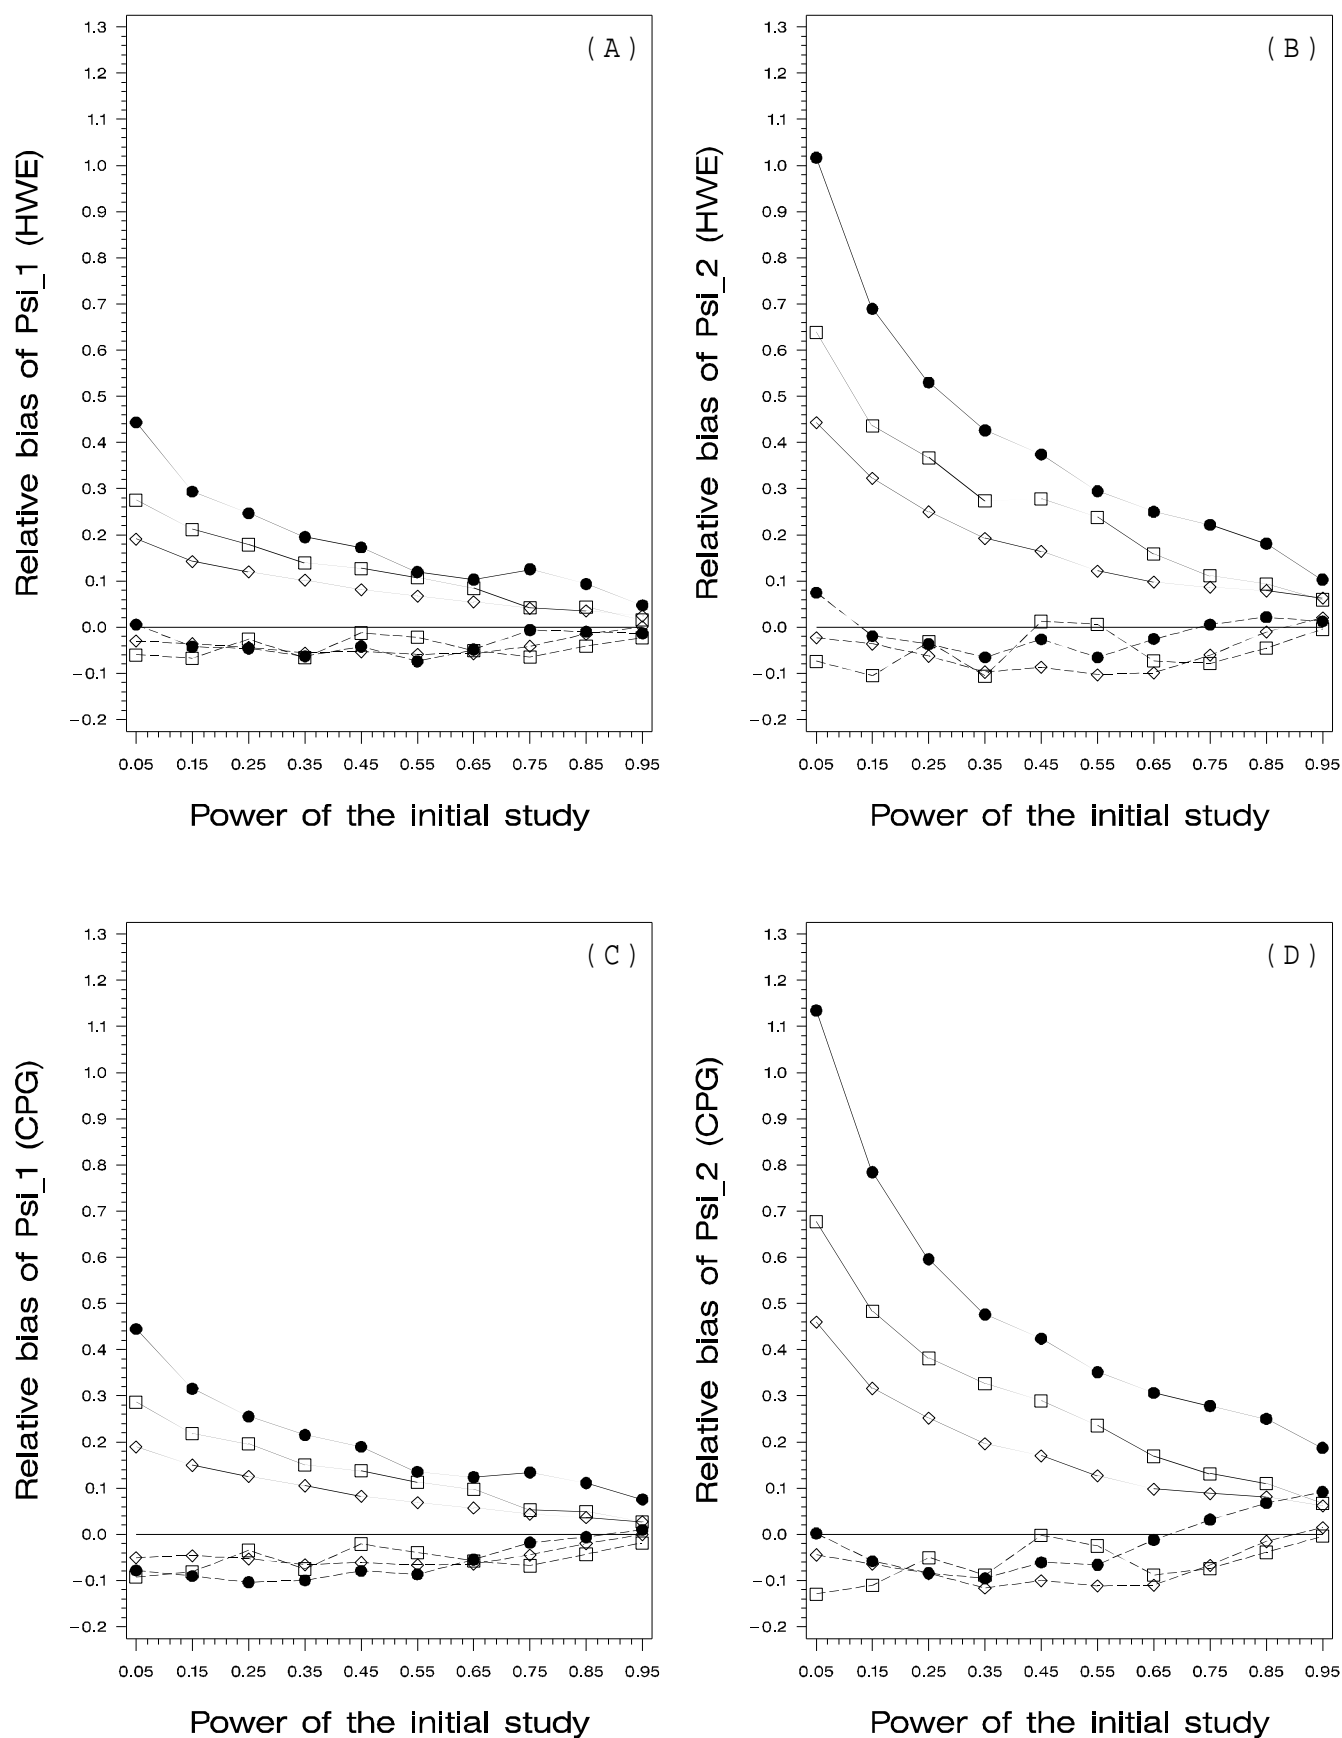

Fig. S7.—

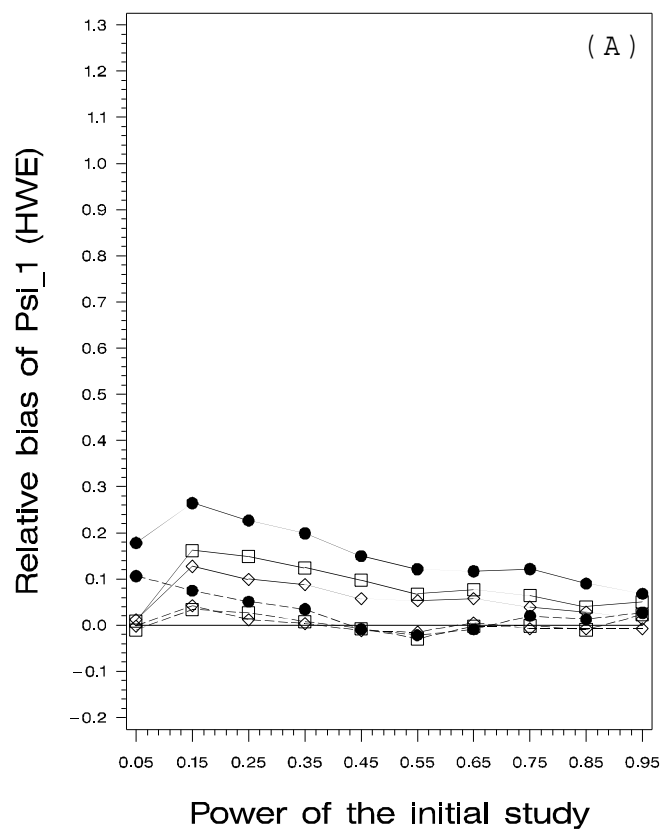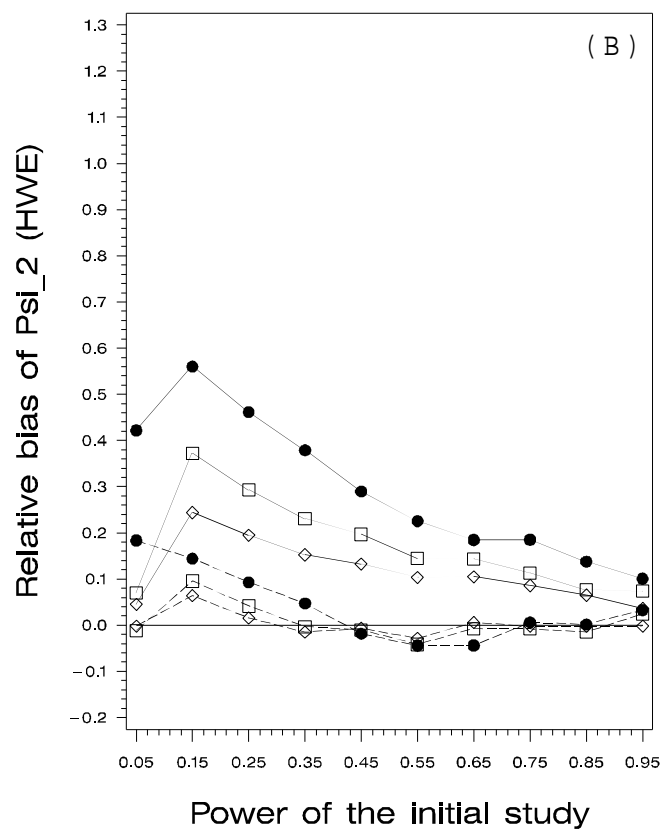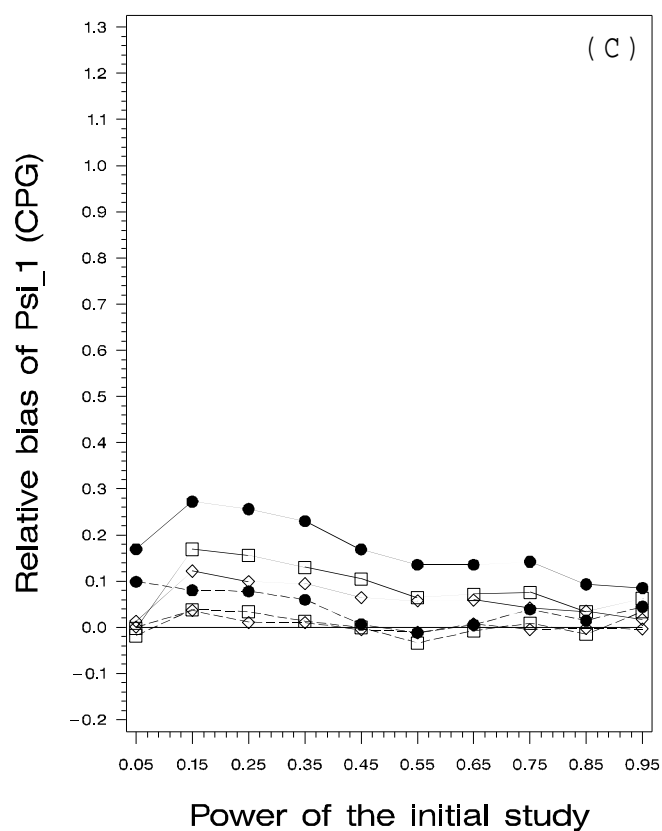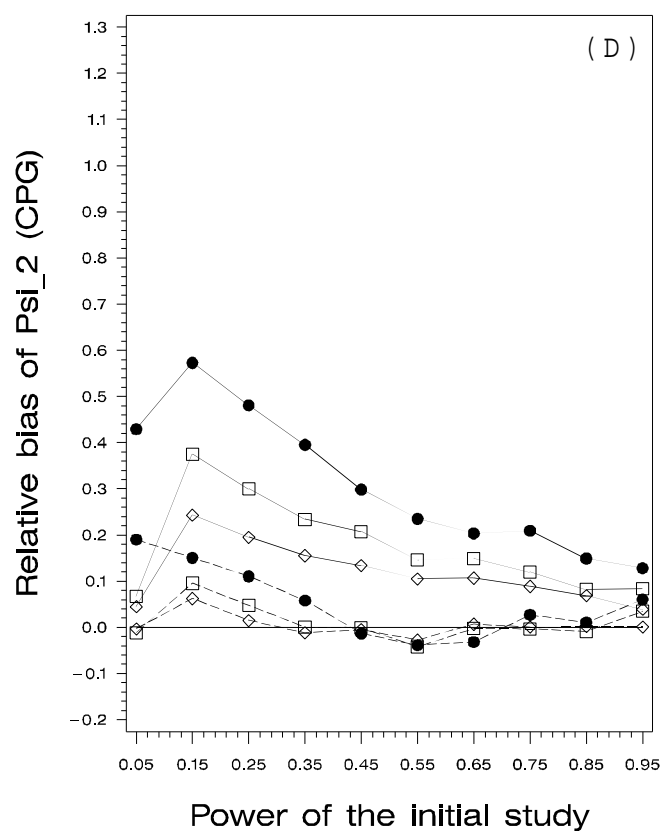



Fig. S8.—

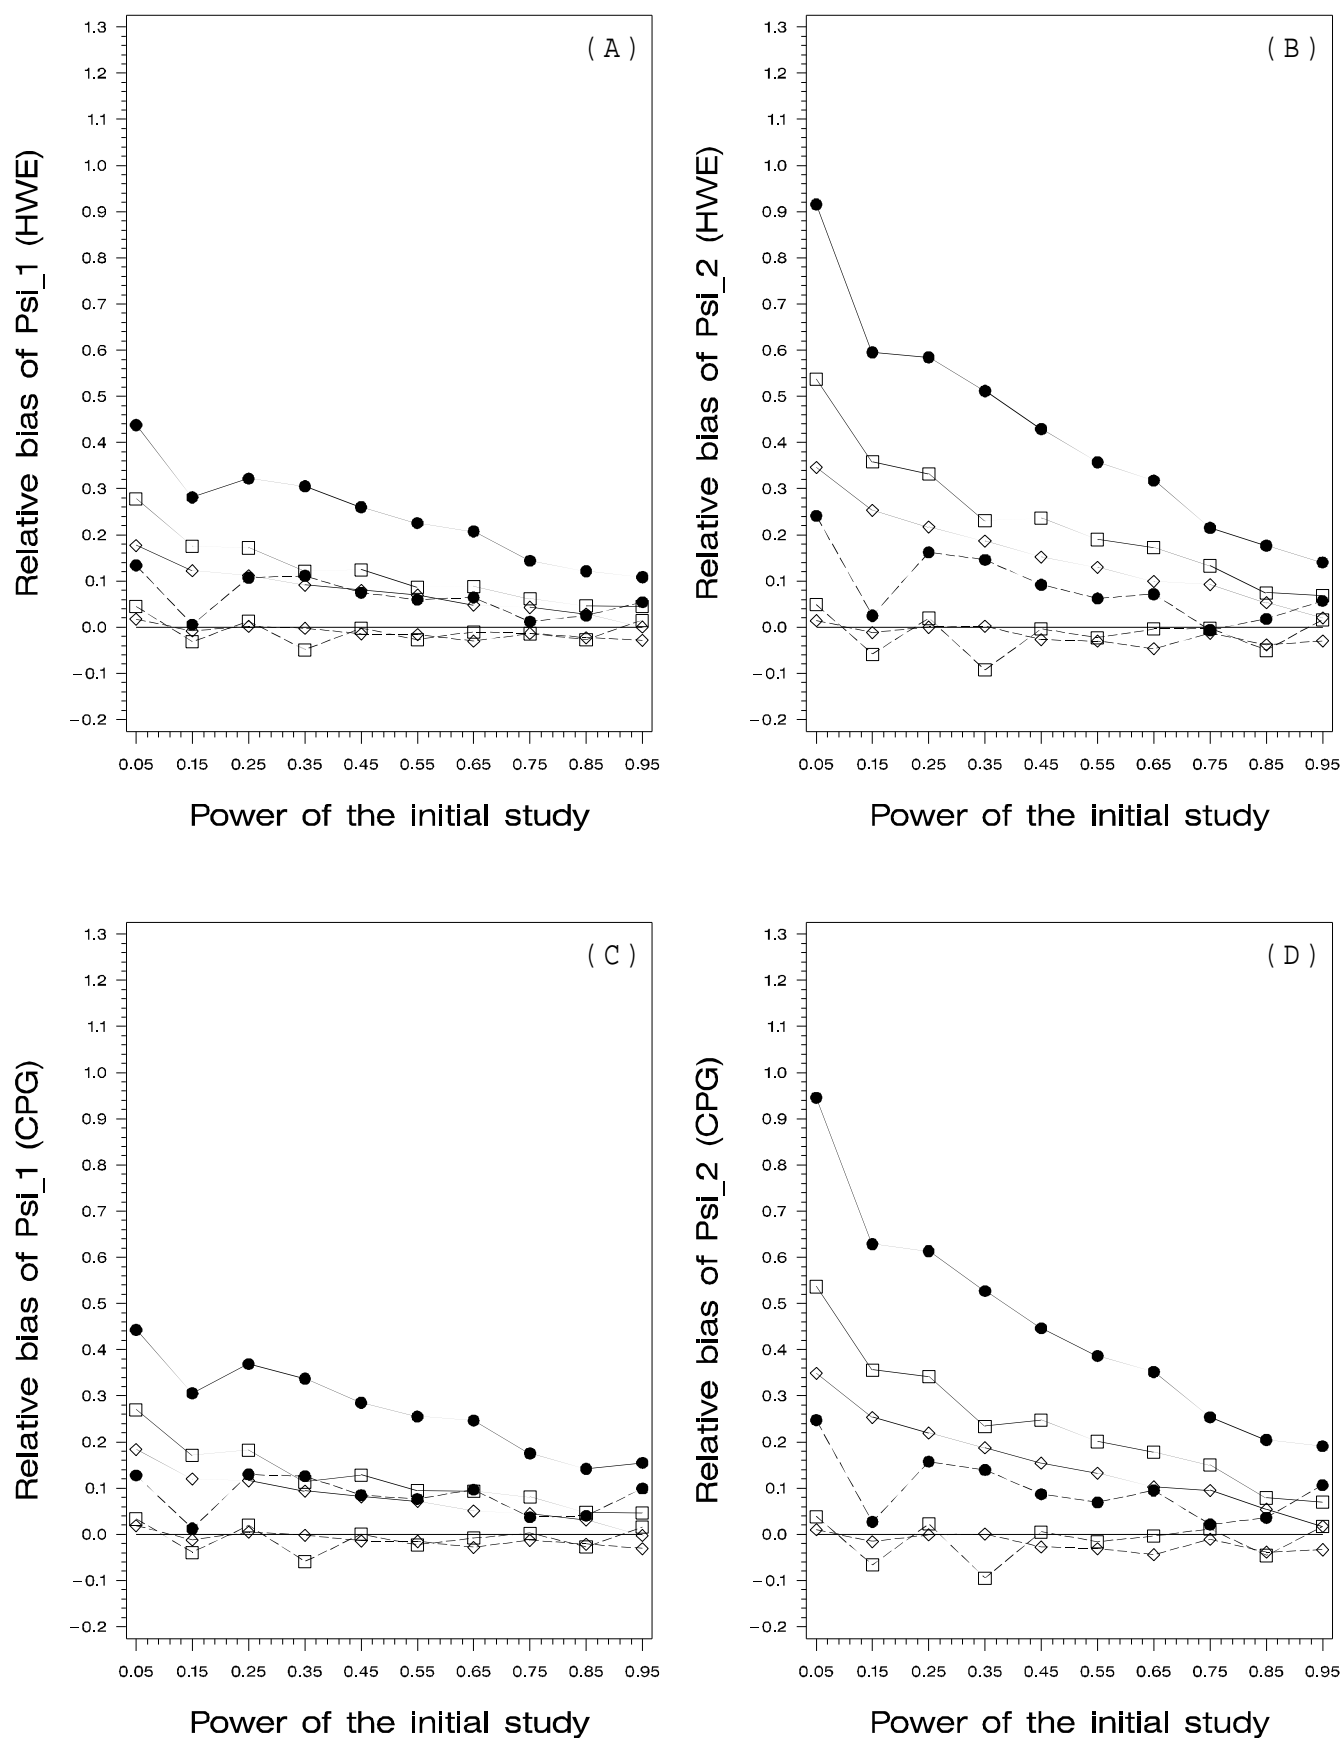

Fig. S9.—

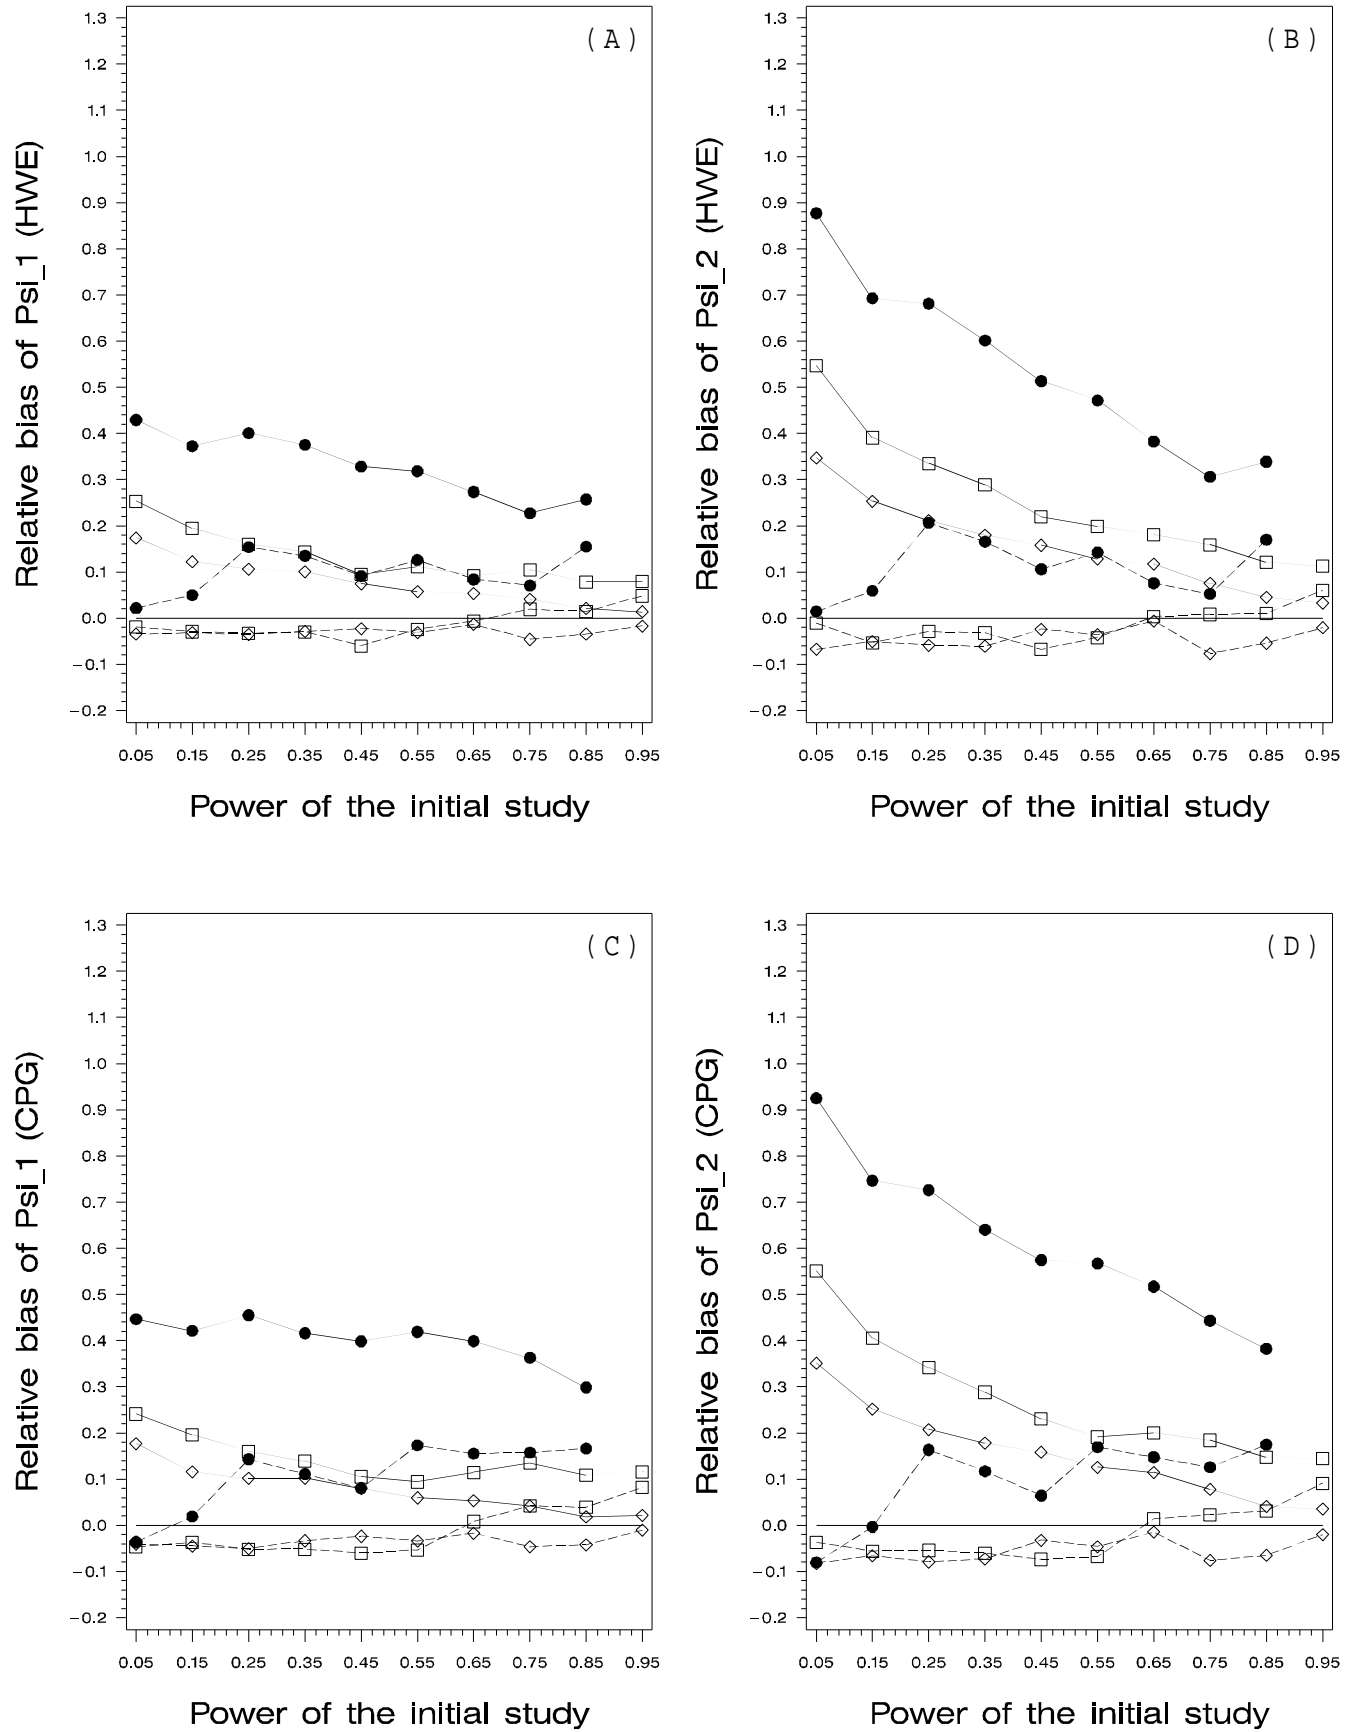

Fig. S10.—

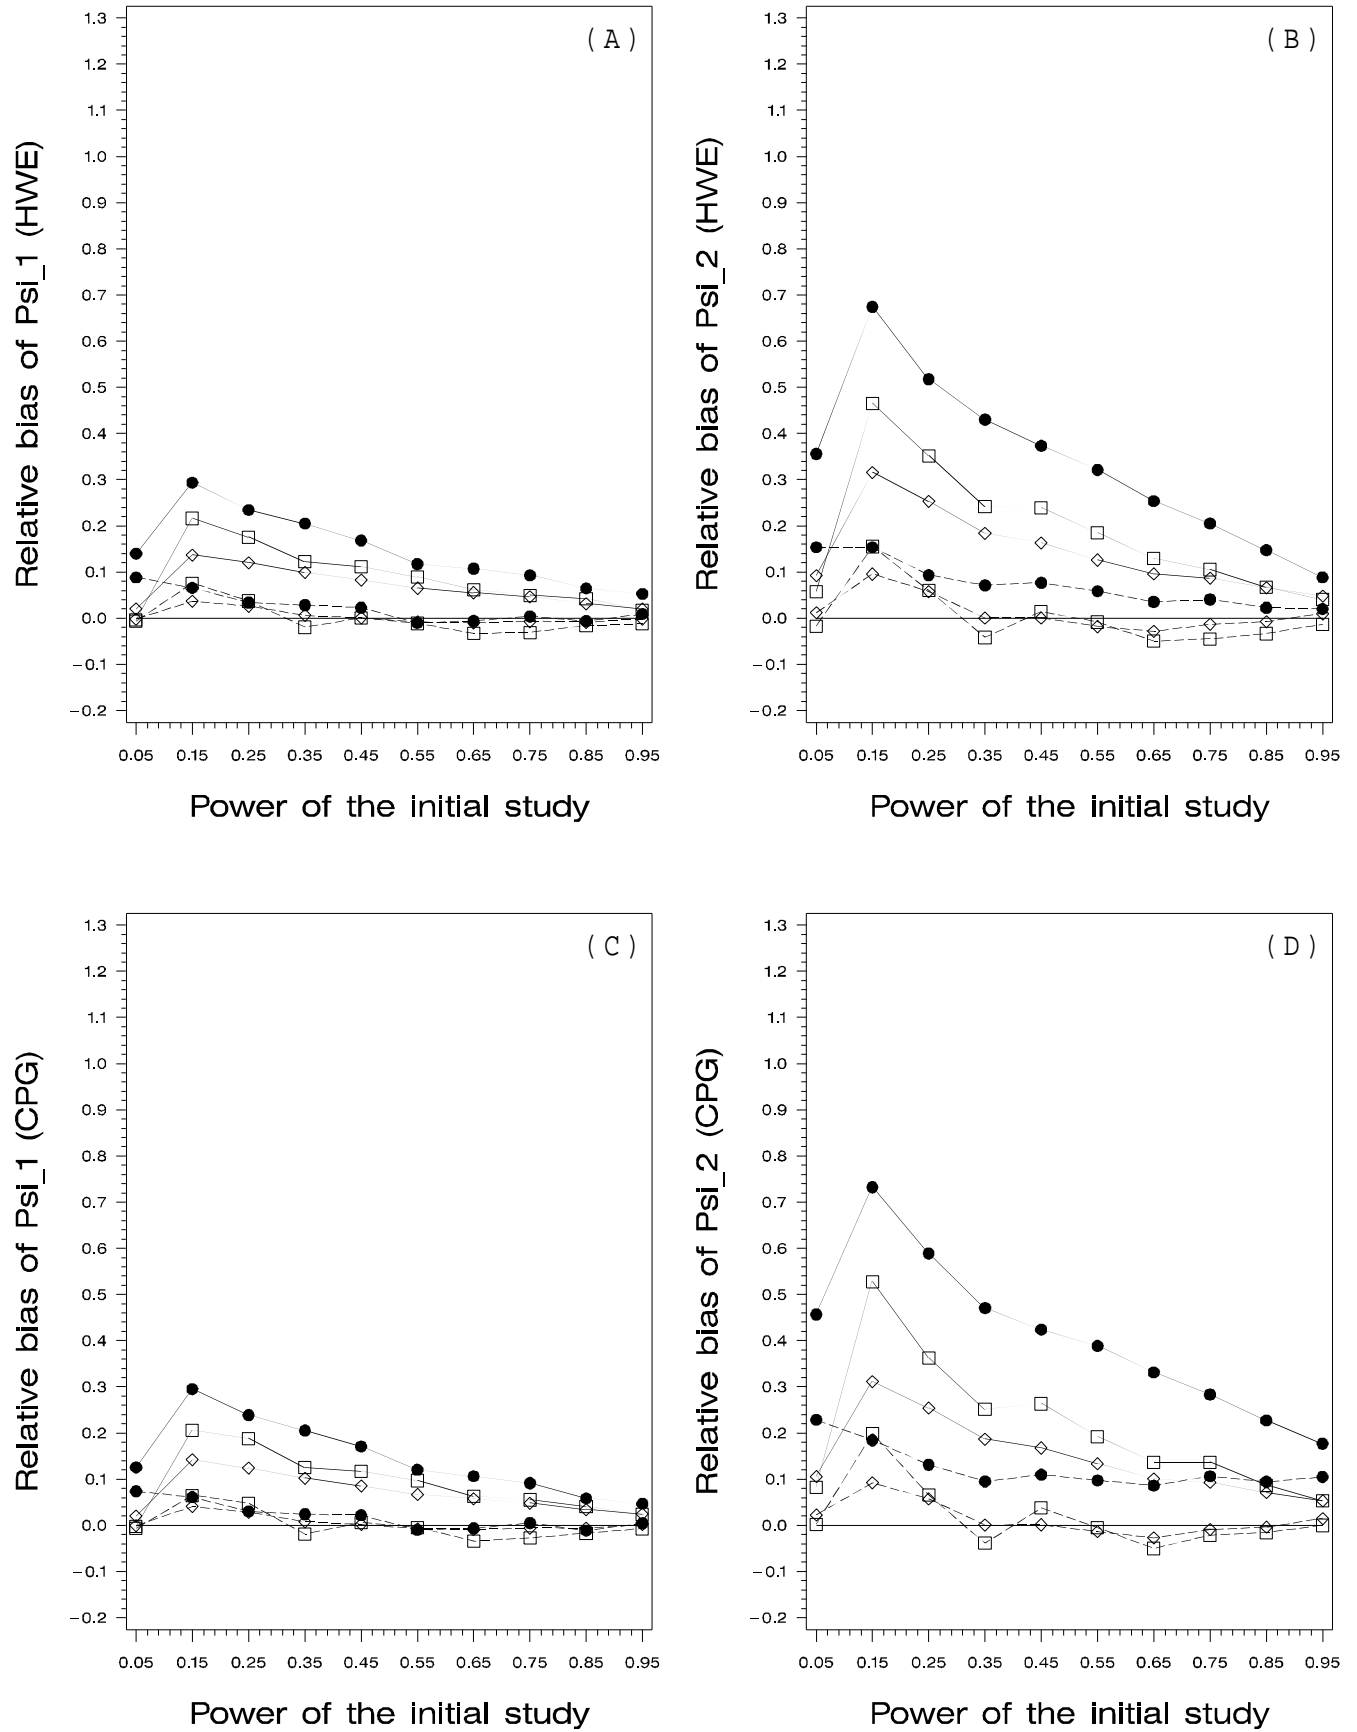

Fig. S11.—

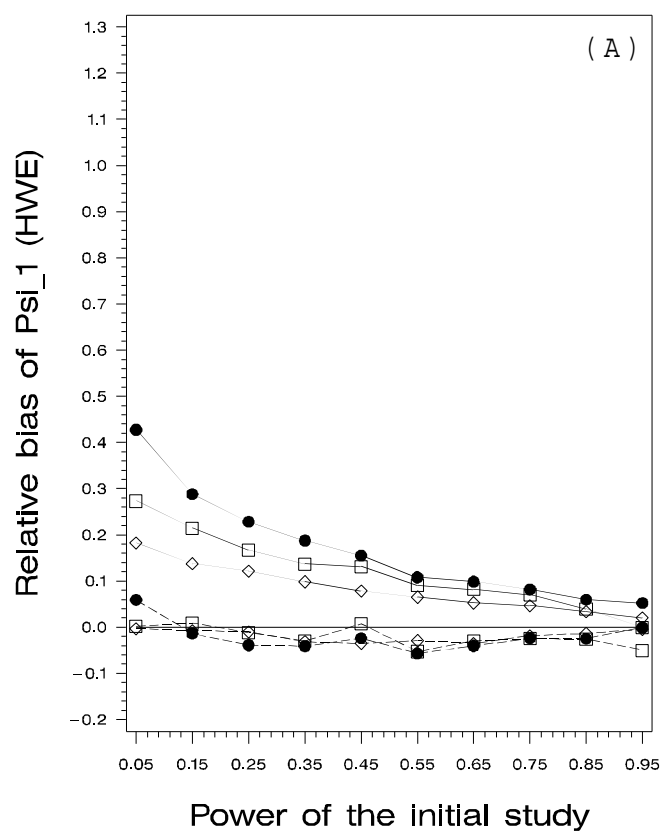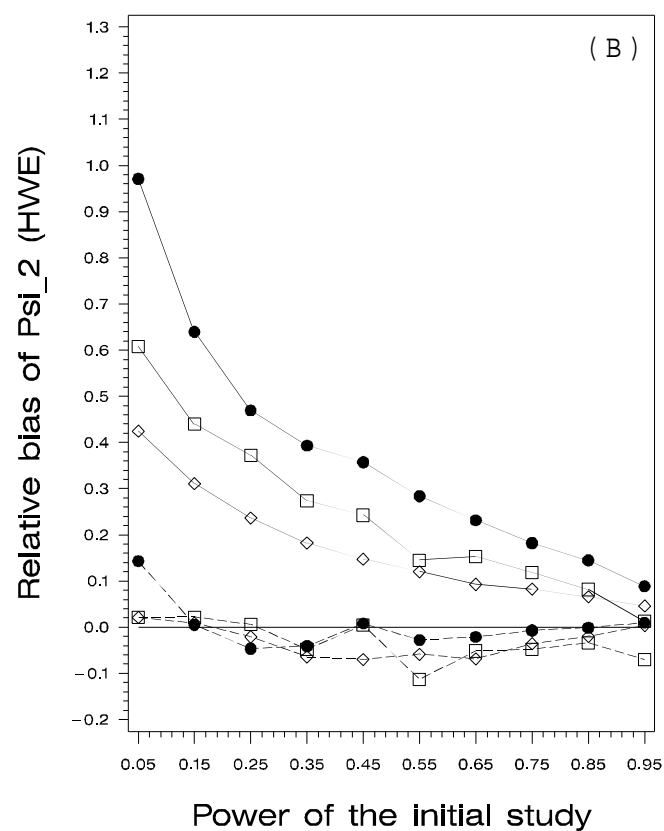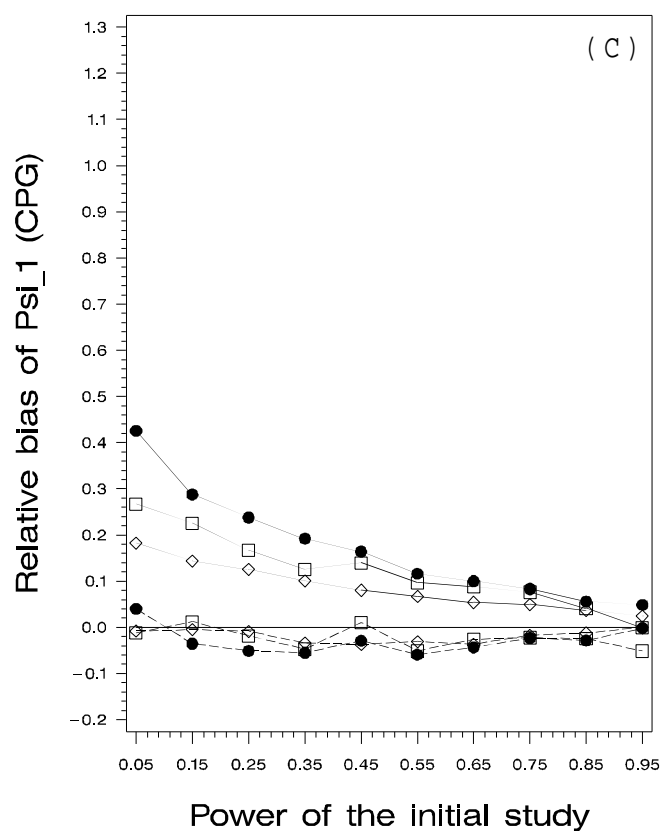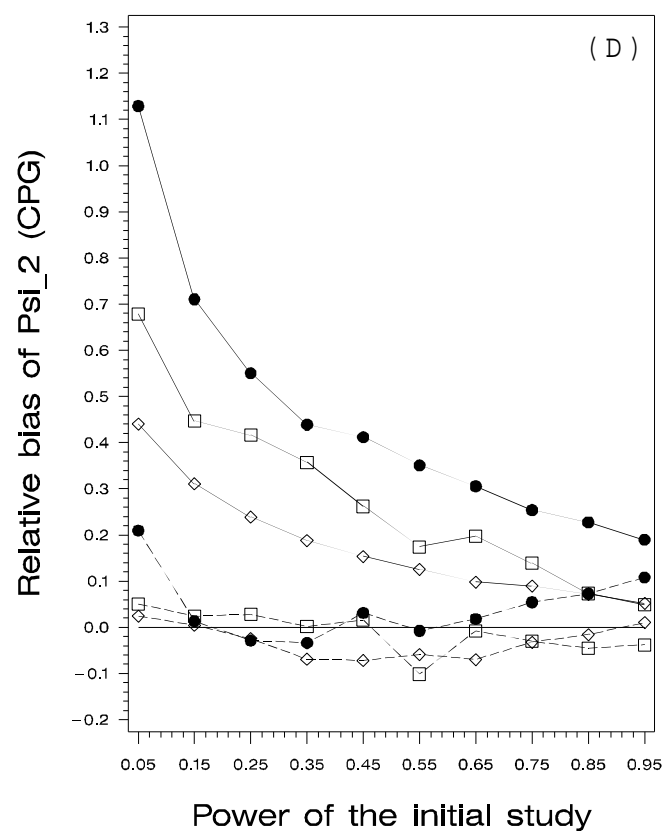

Fig. S12.—

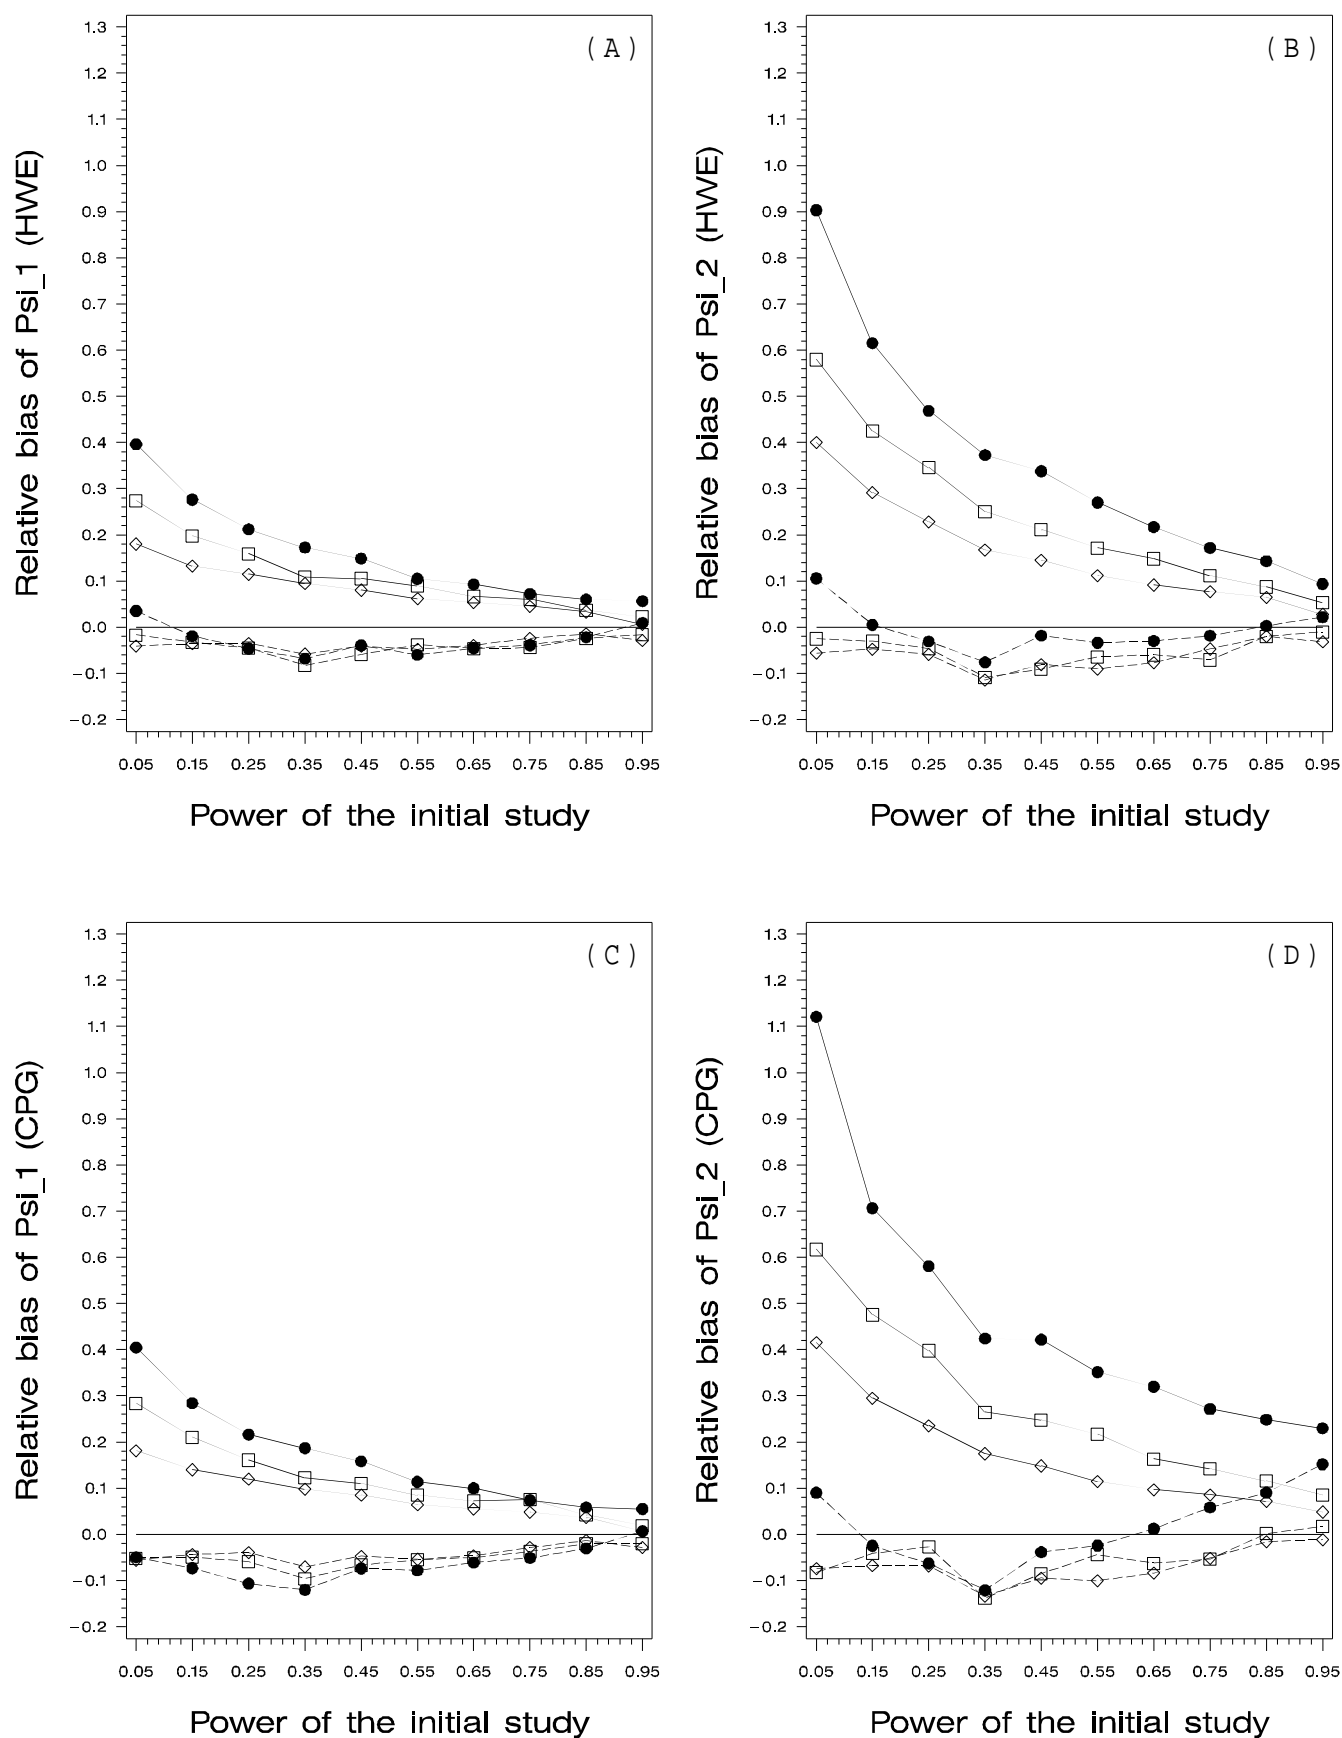

Fig. S13.—

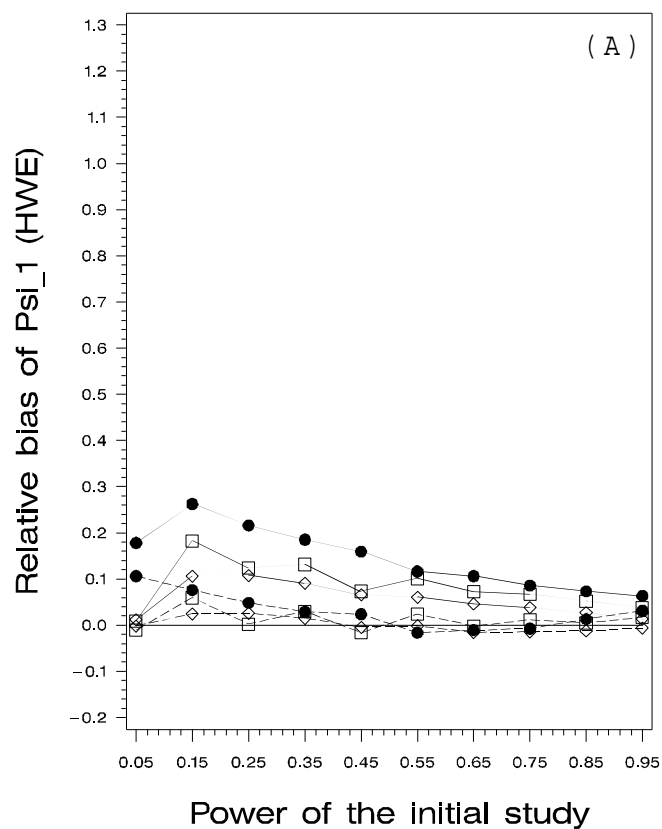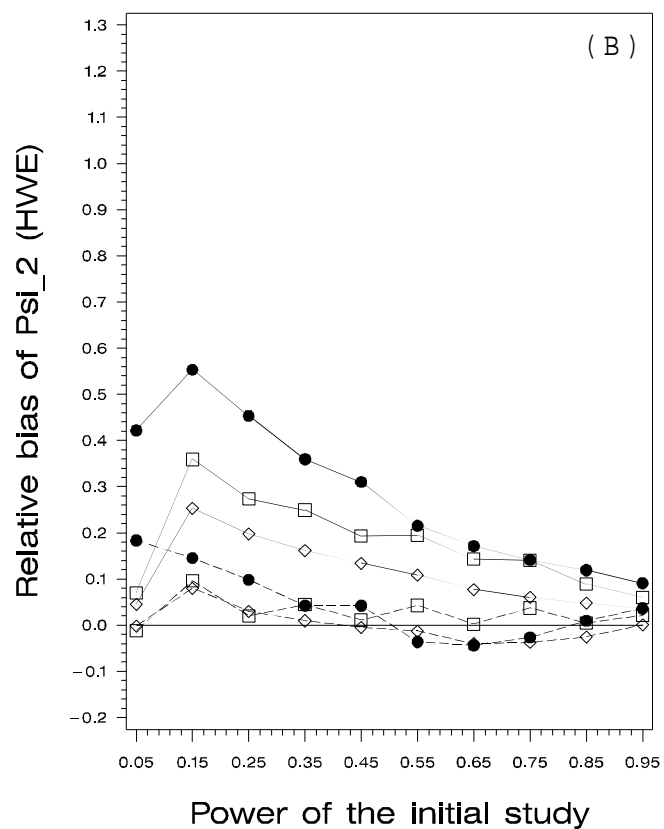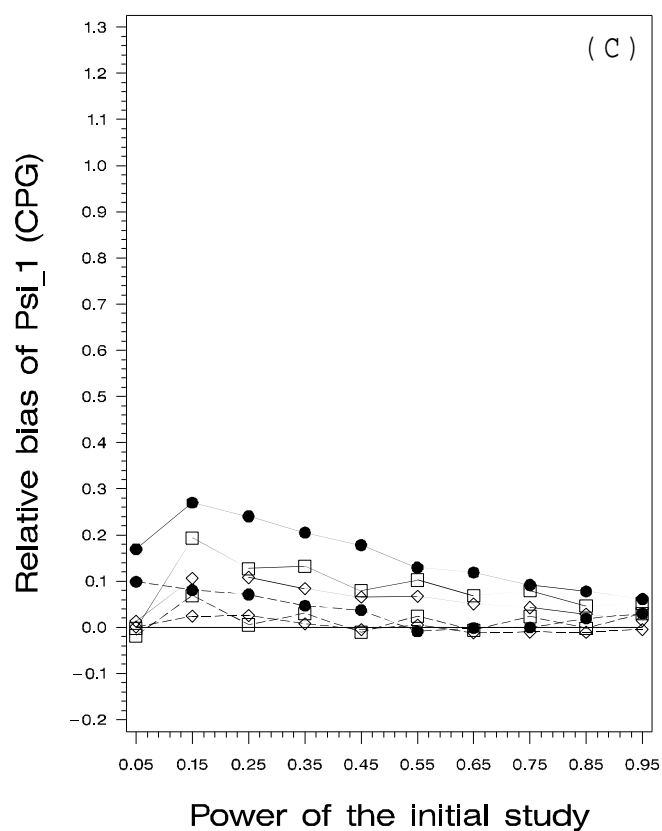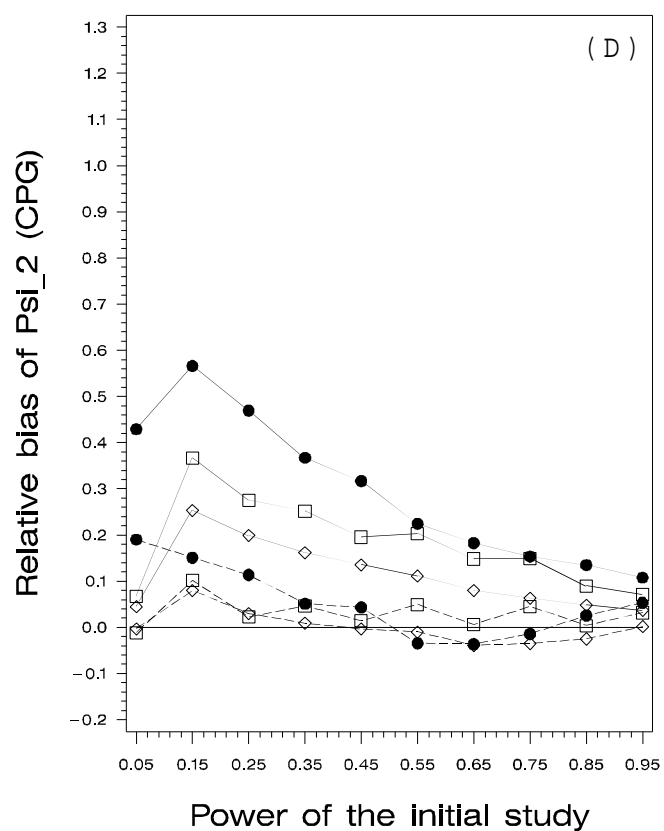

Fig. S14.—

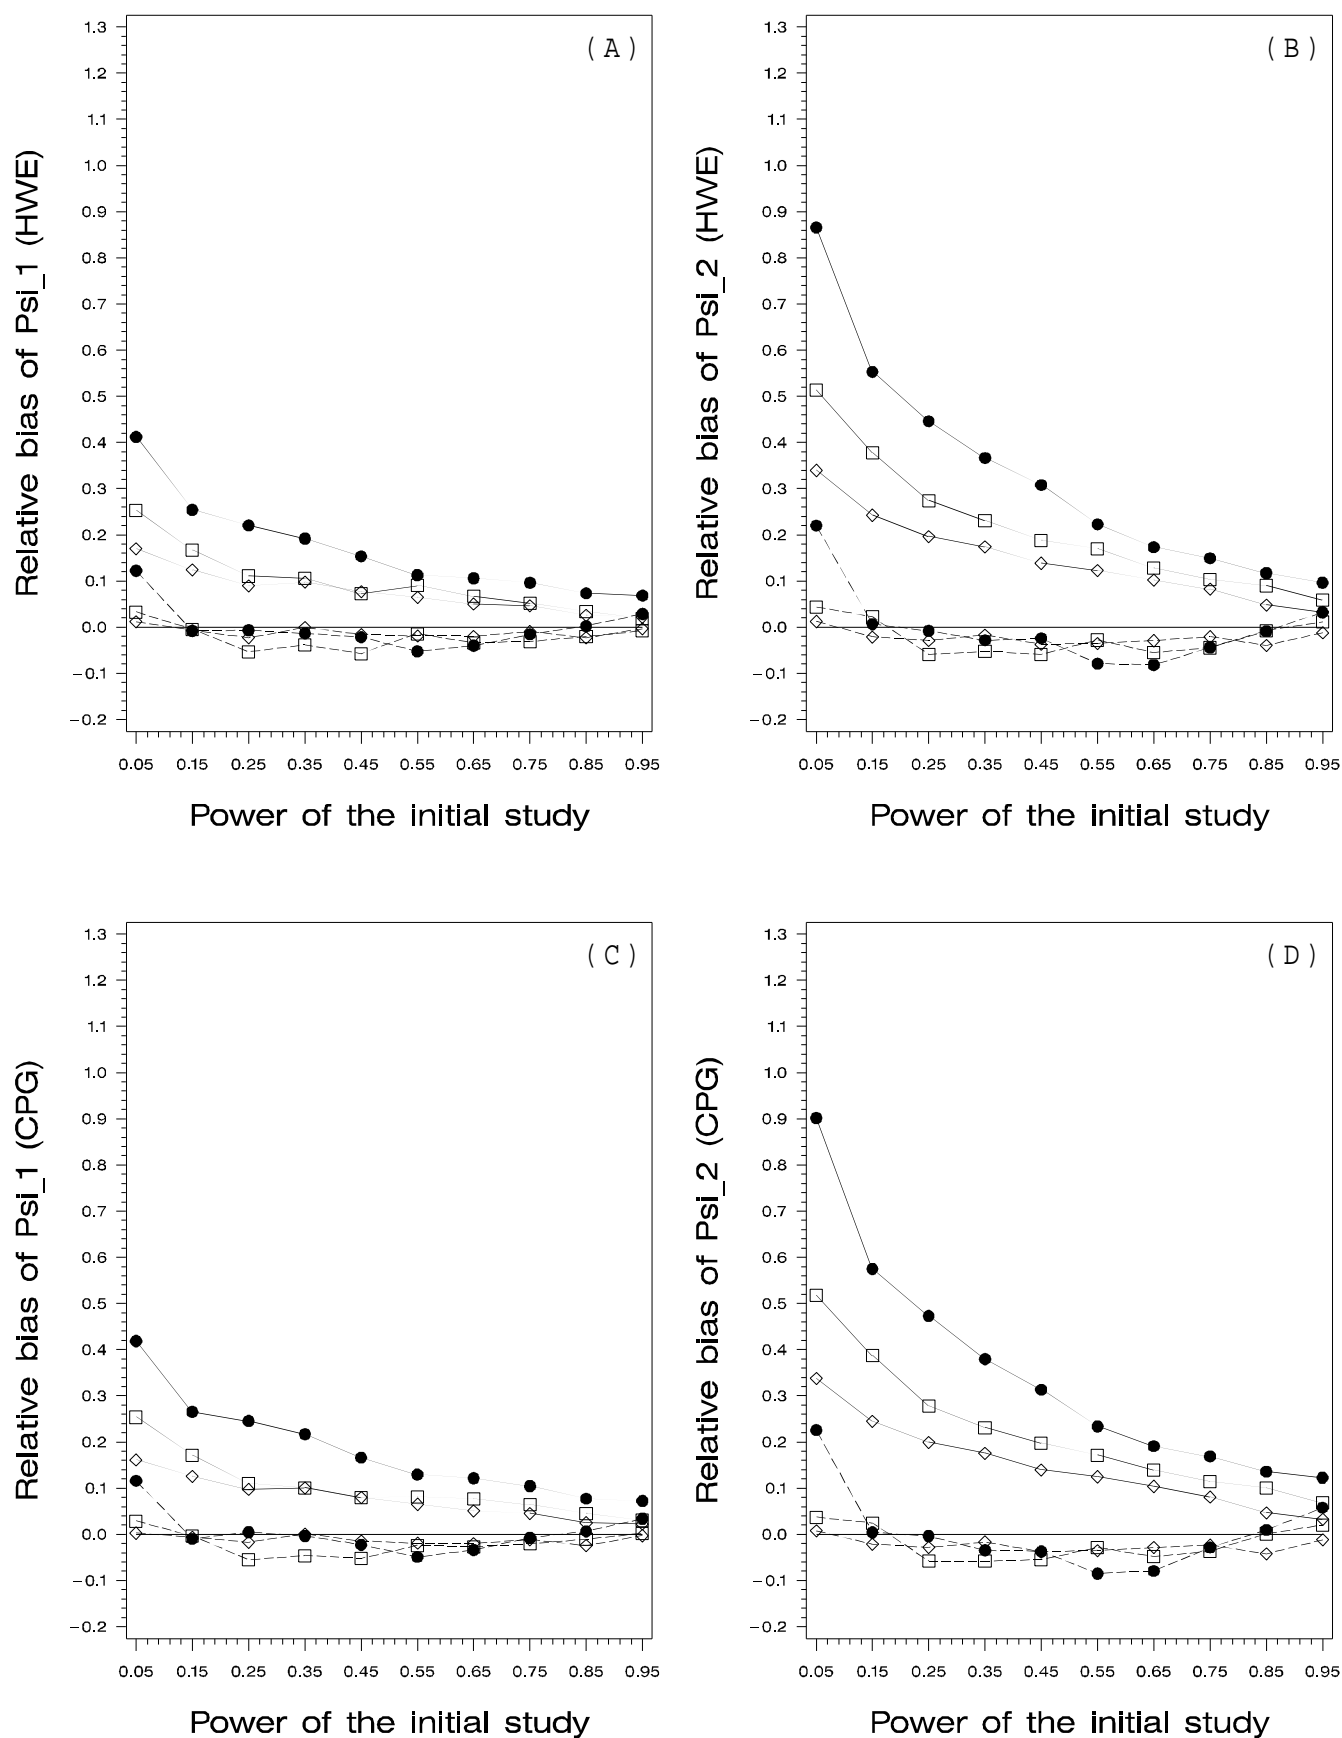

Fig. S15.—

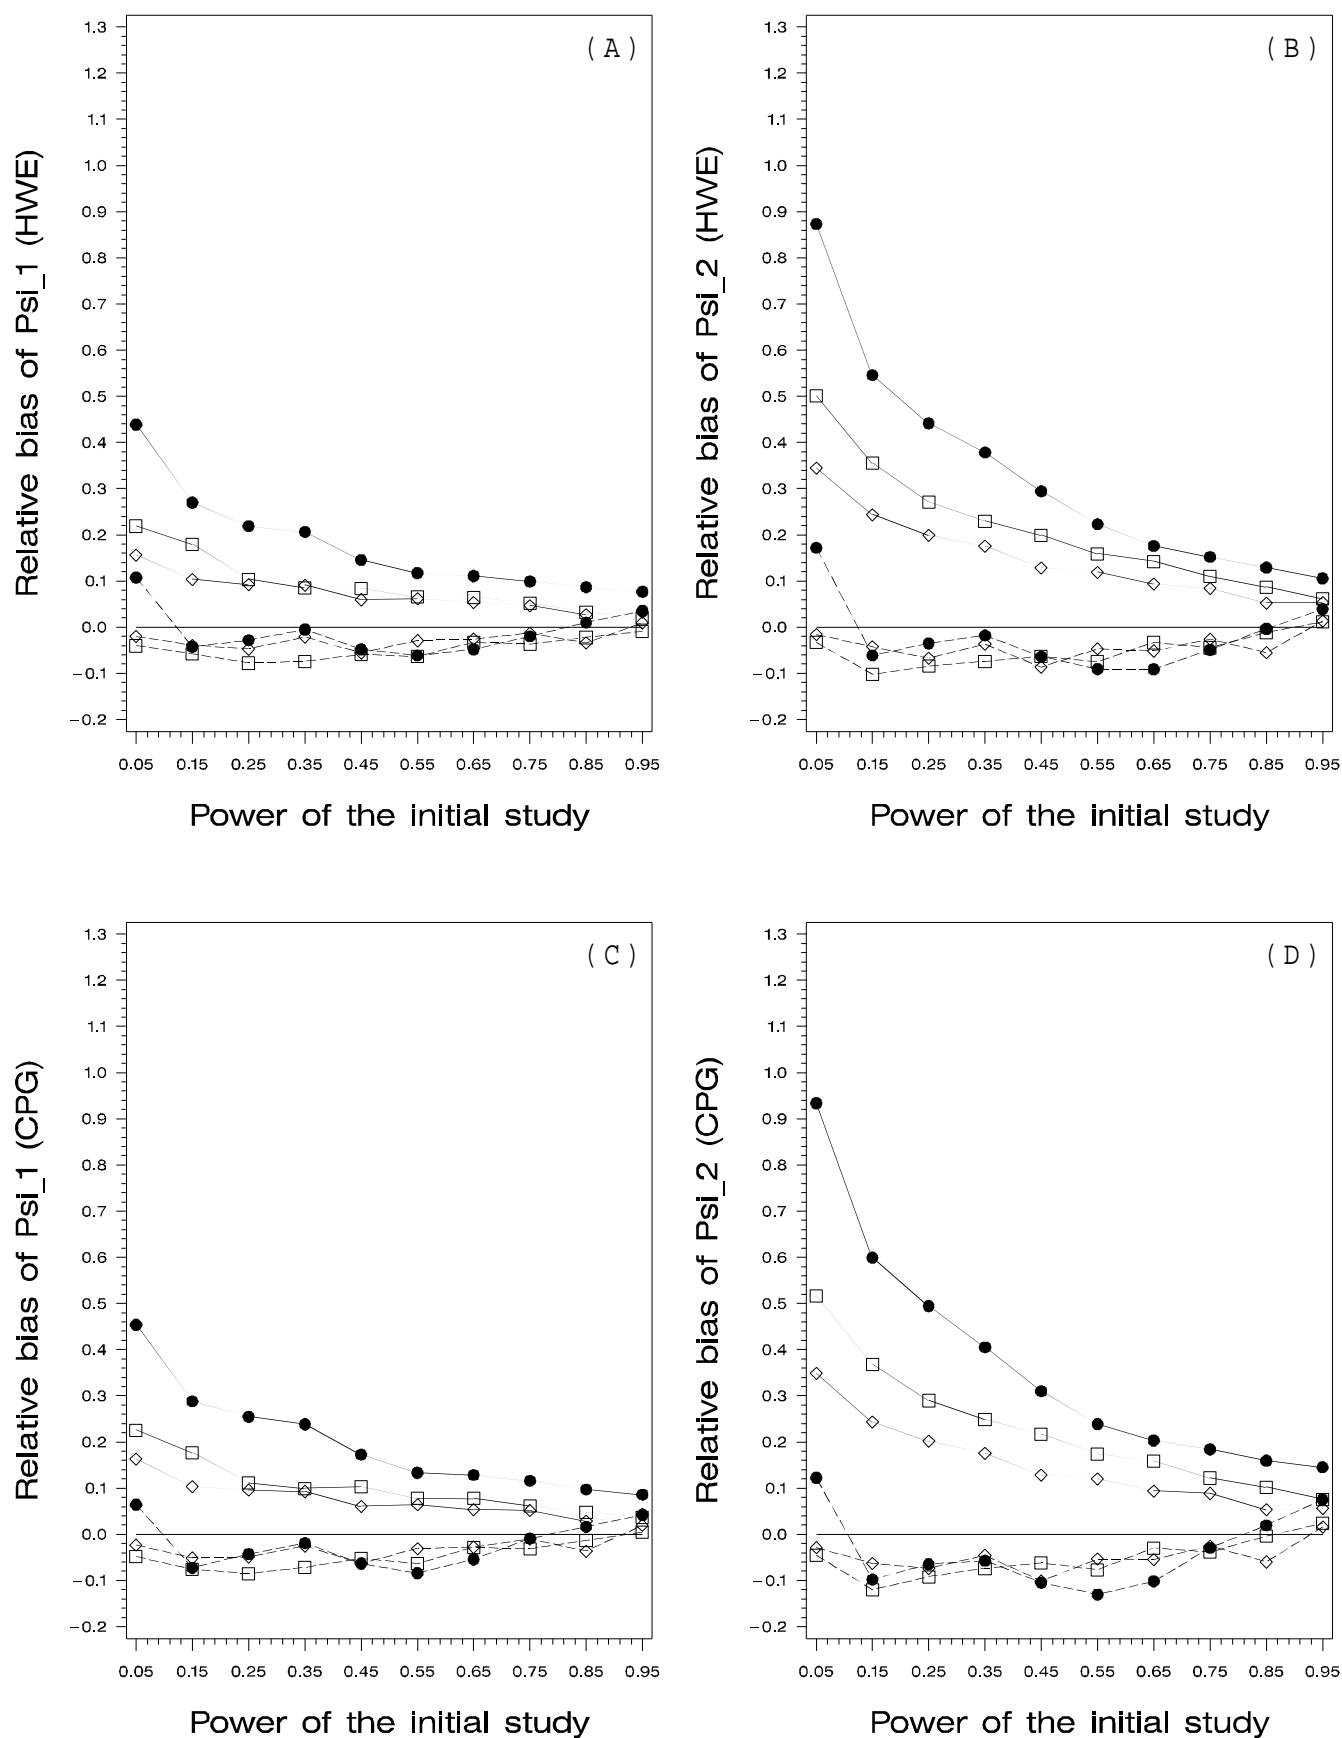



Fig. S16.—

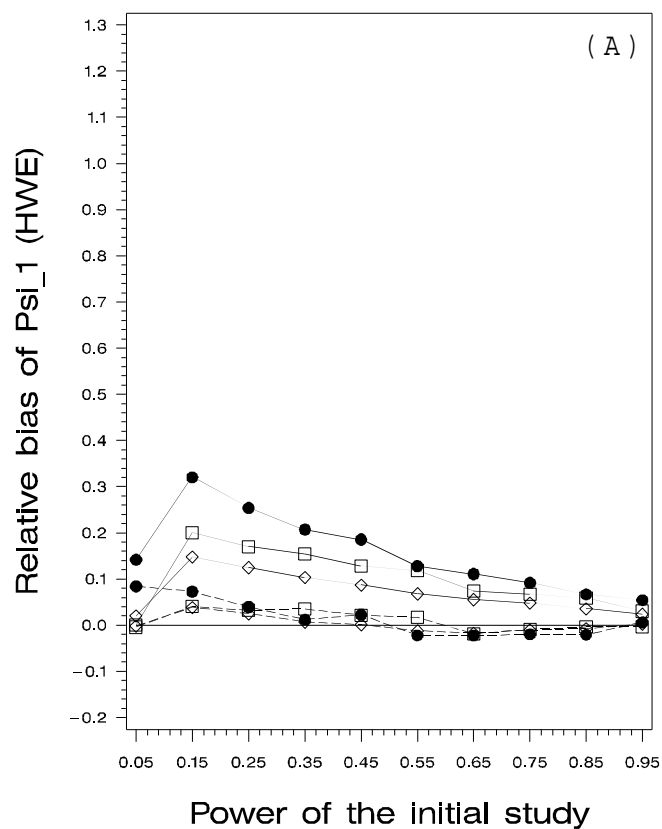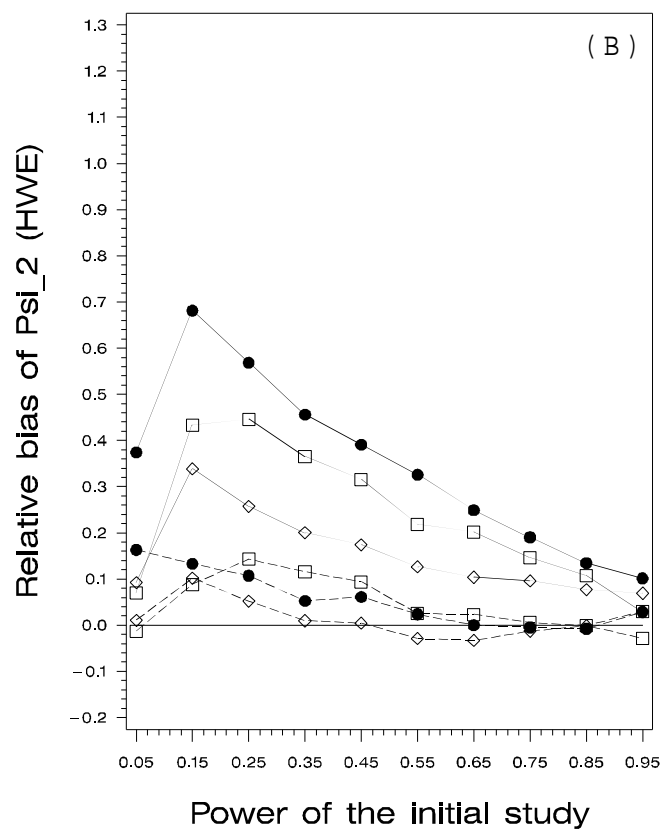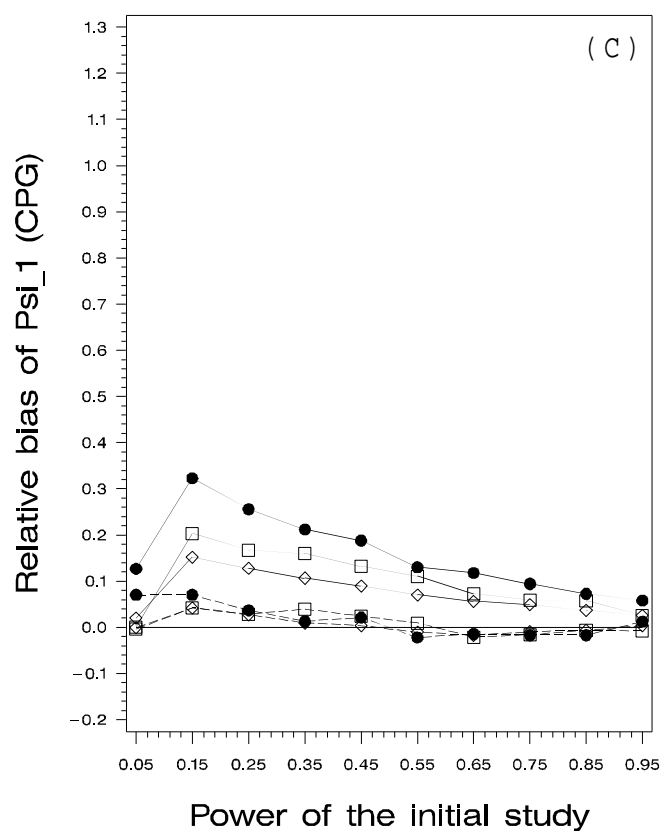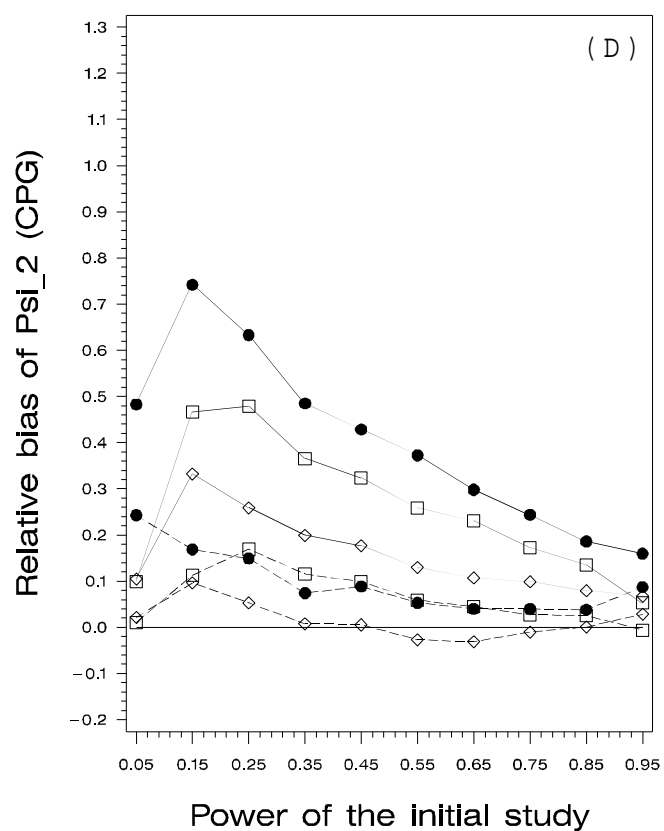

Fig. S17.—

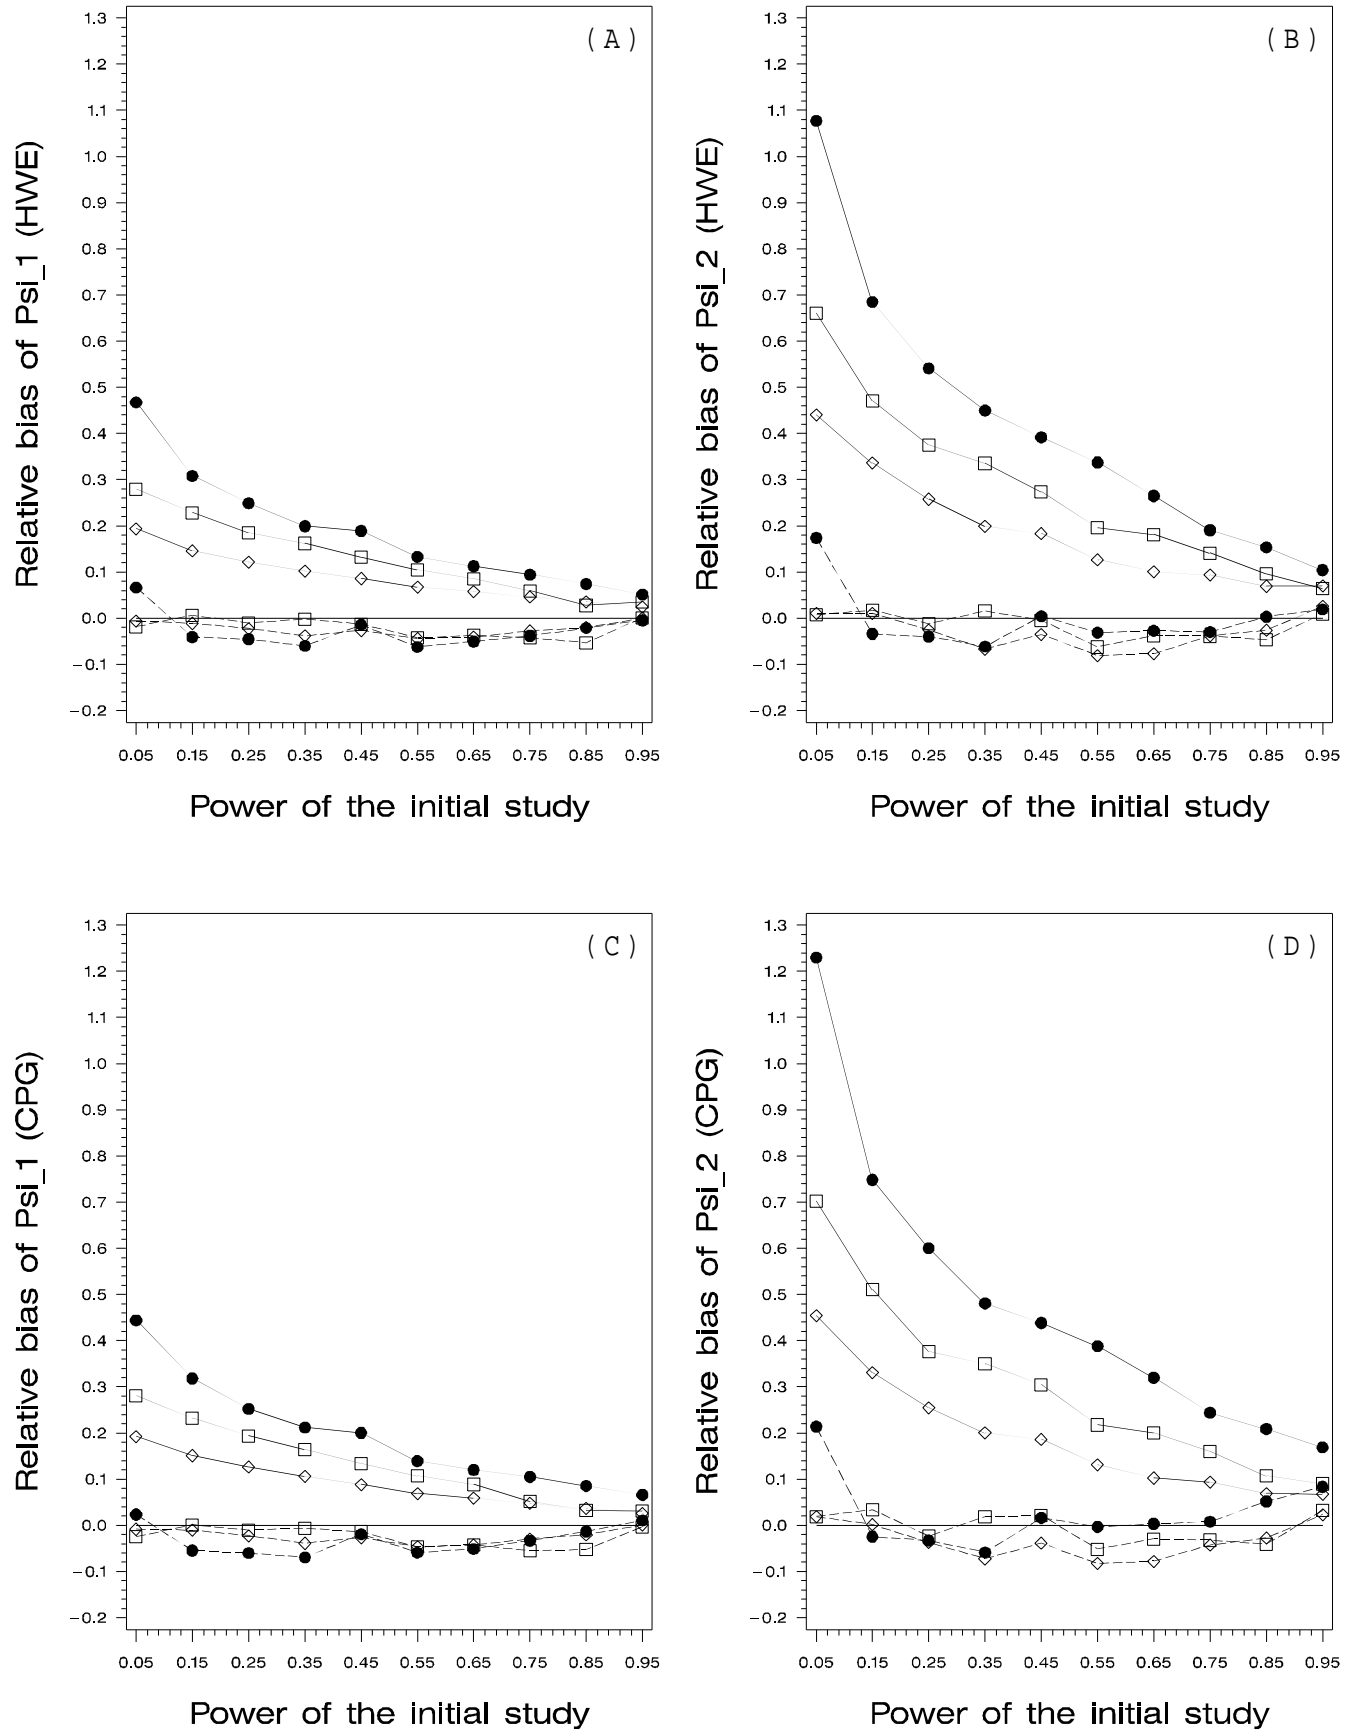

Fig. S18.—

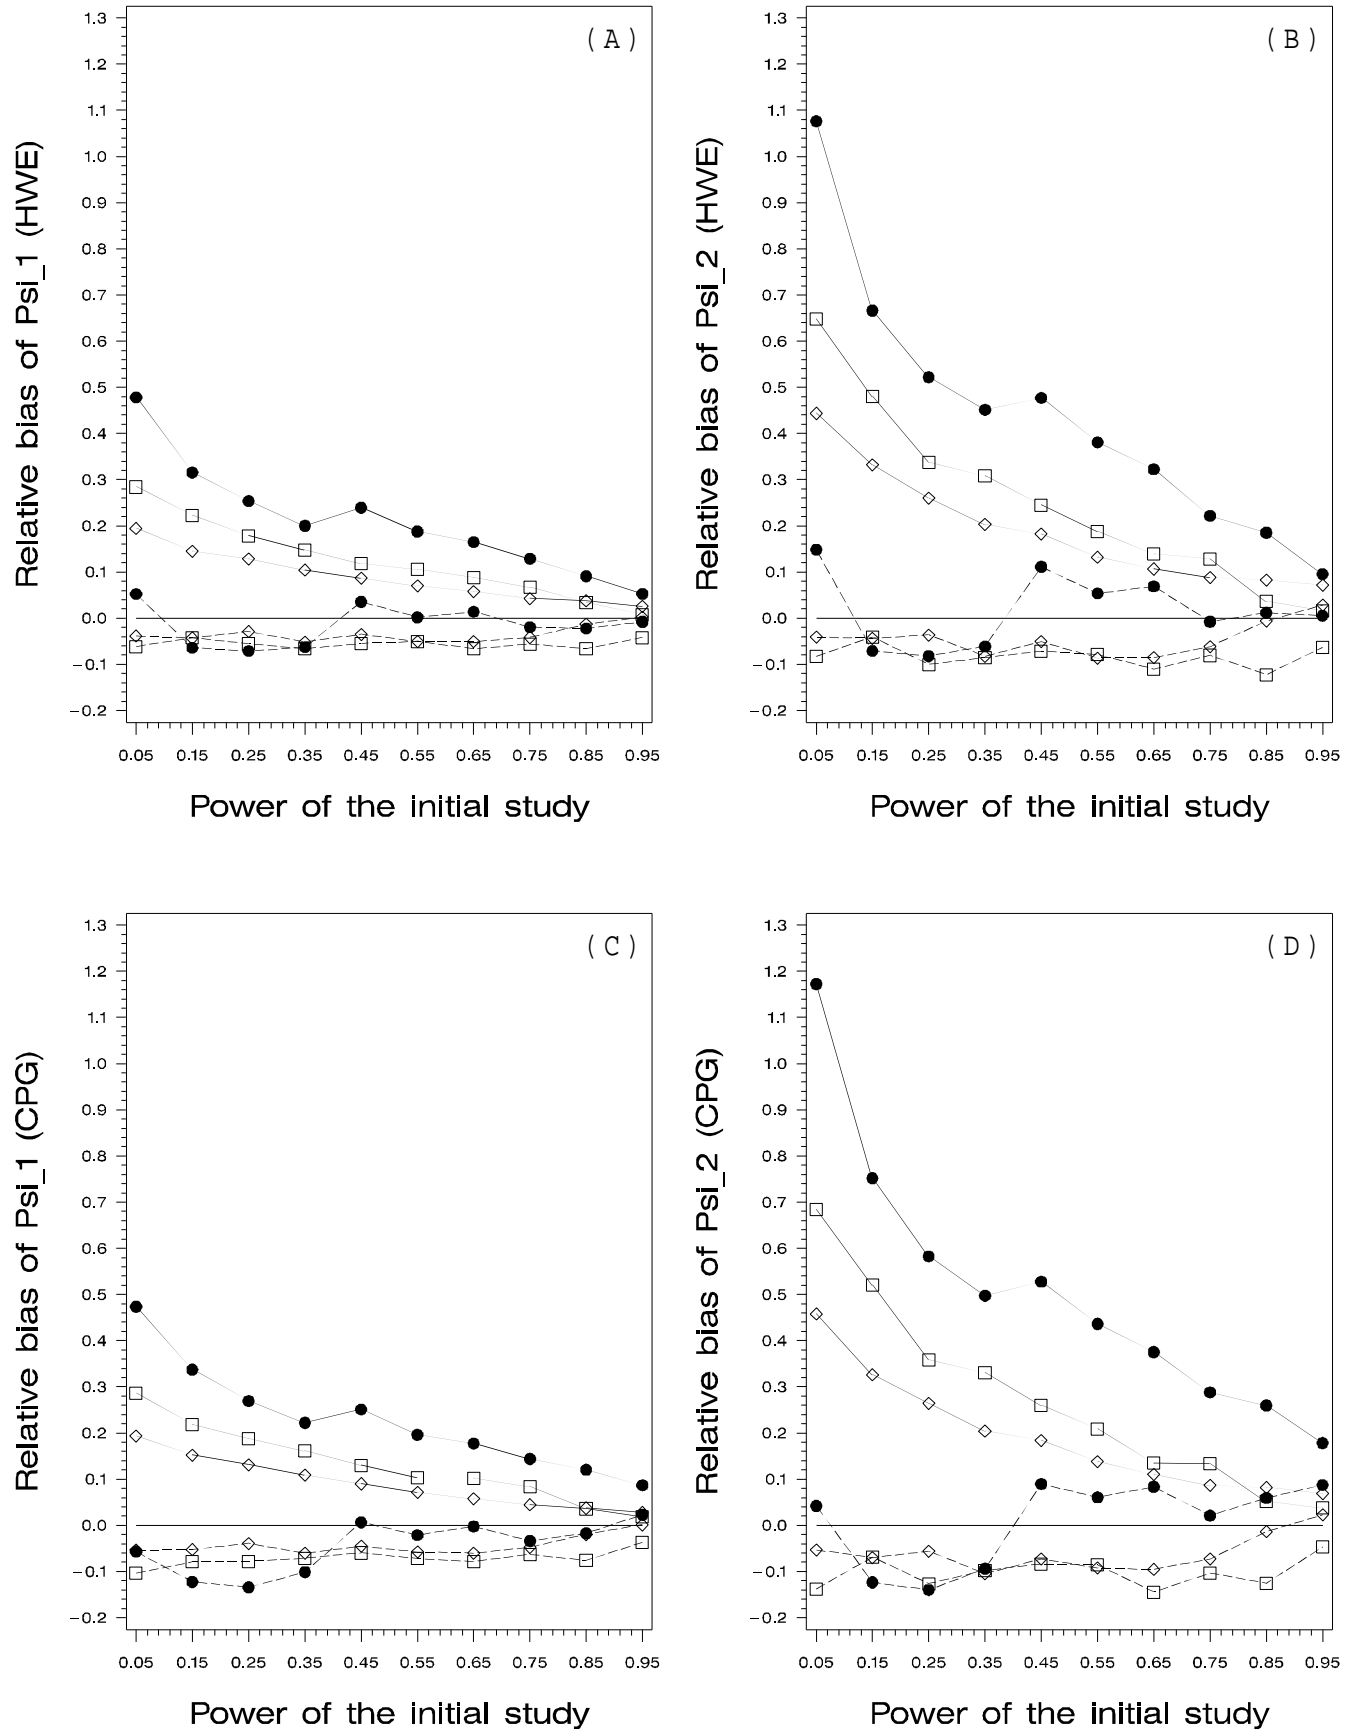

Fig. S19.—

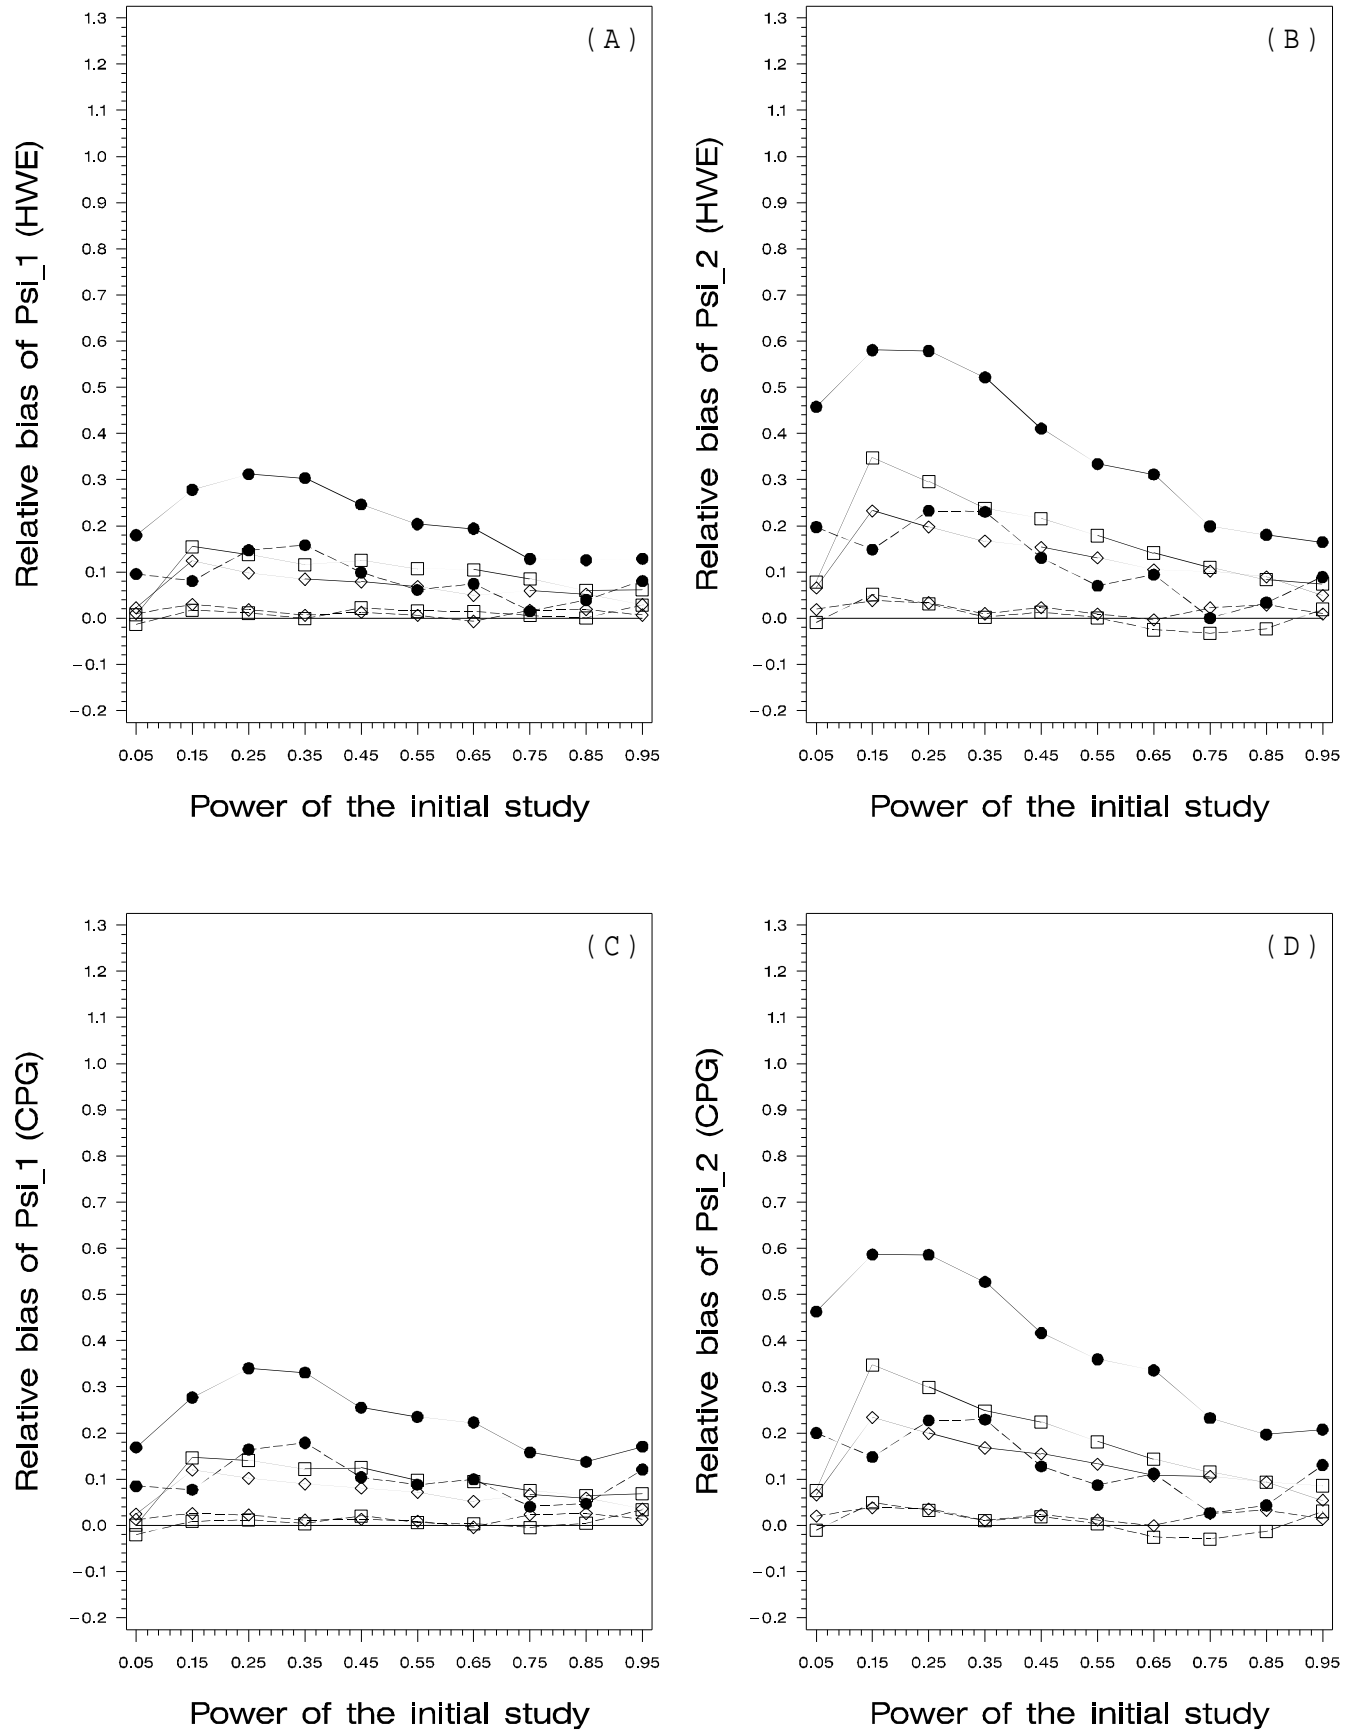

Fig. S20.—

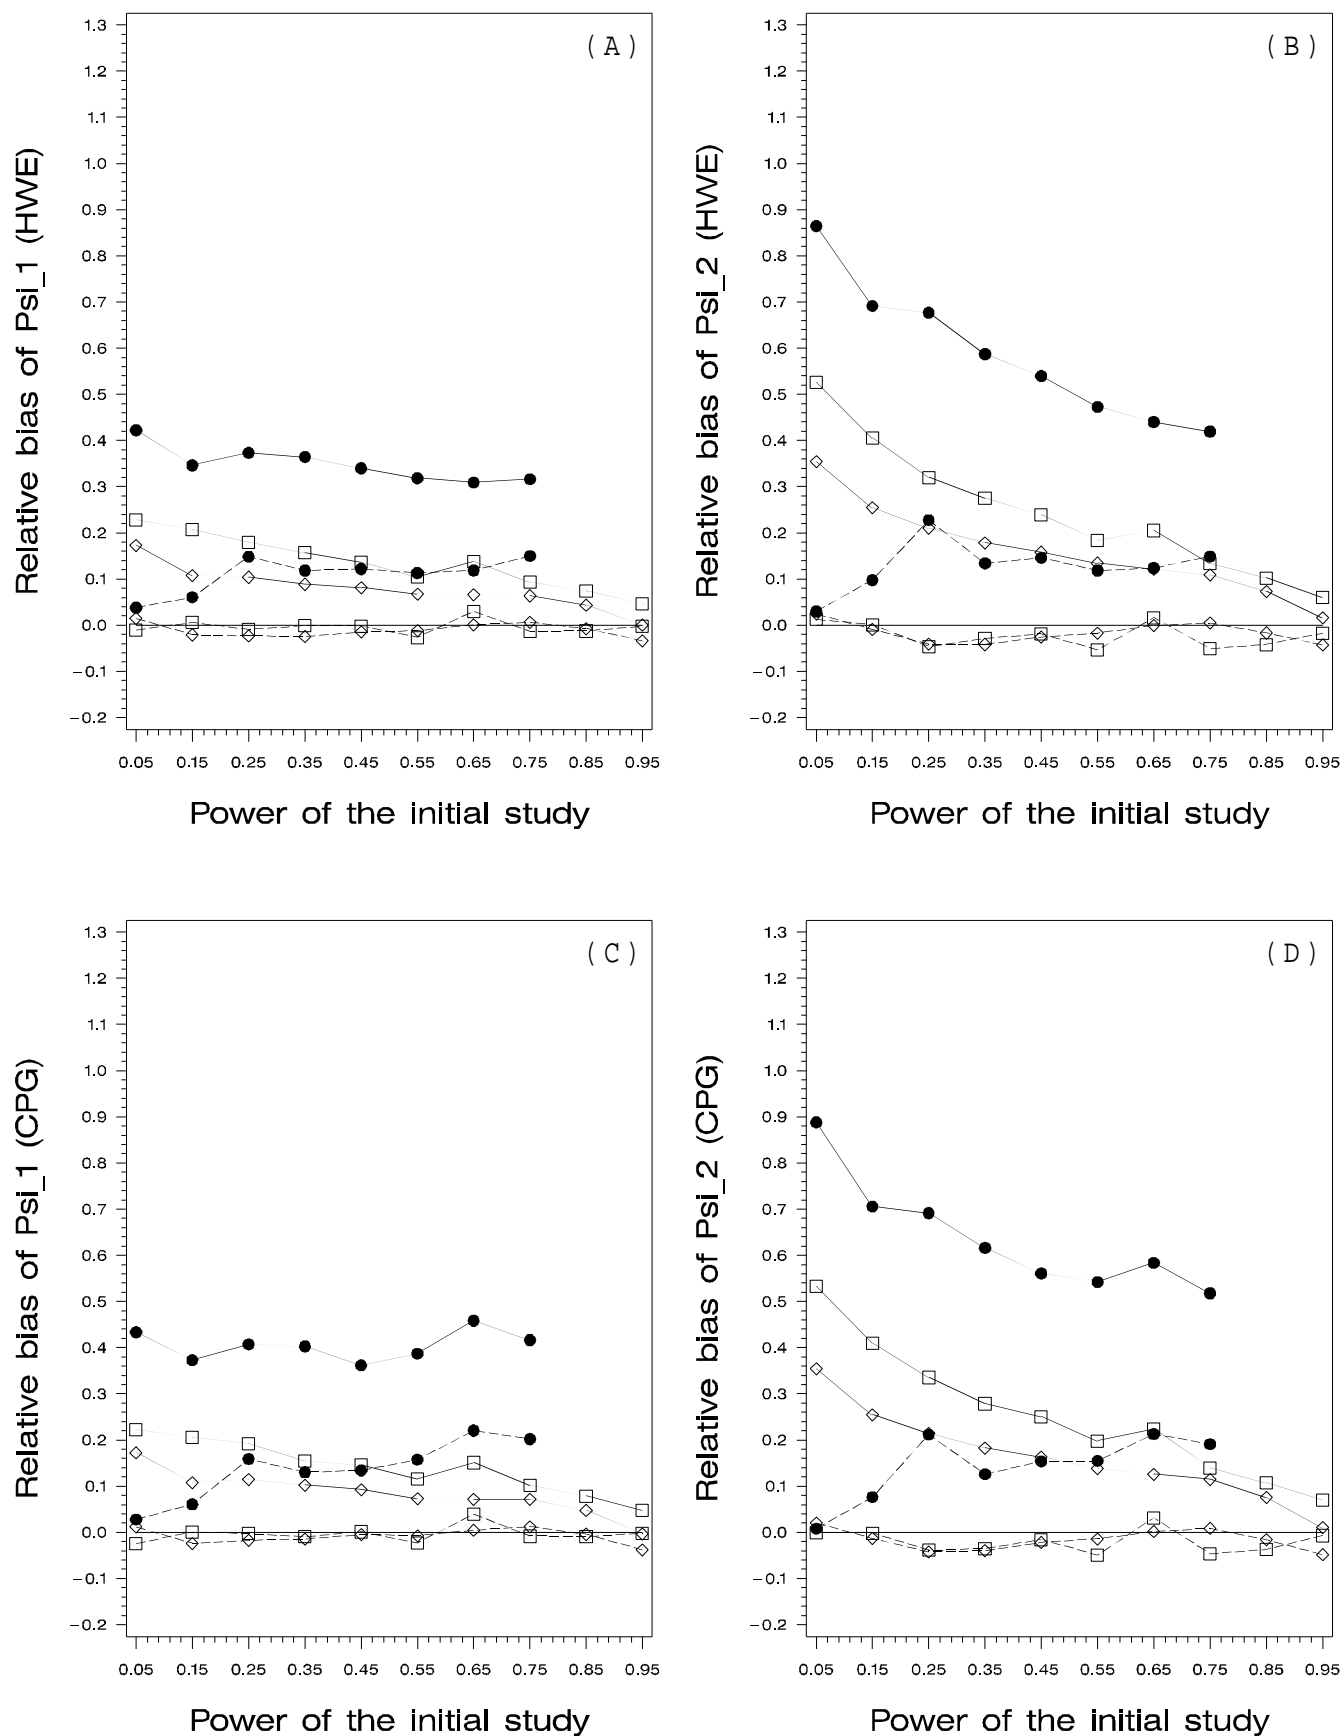

Fig. S21.—

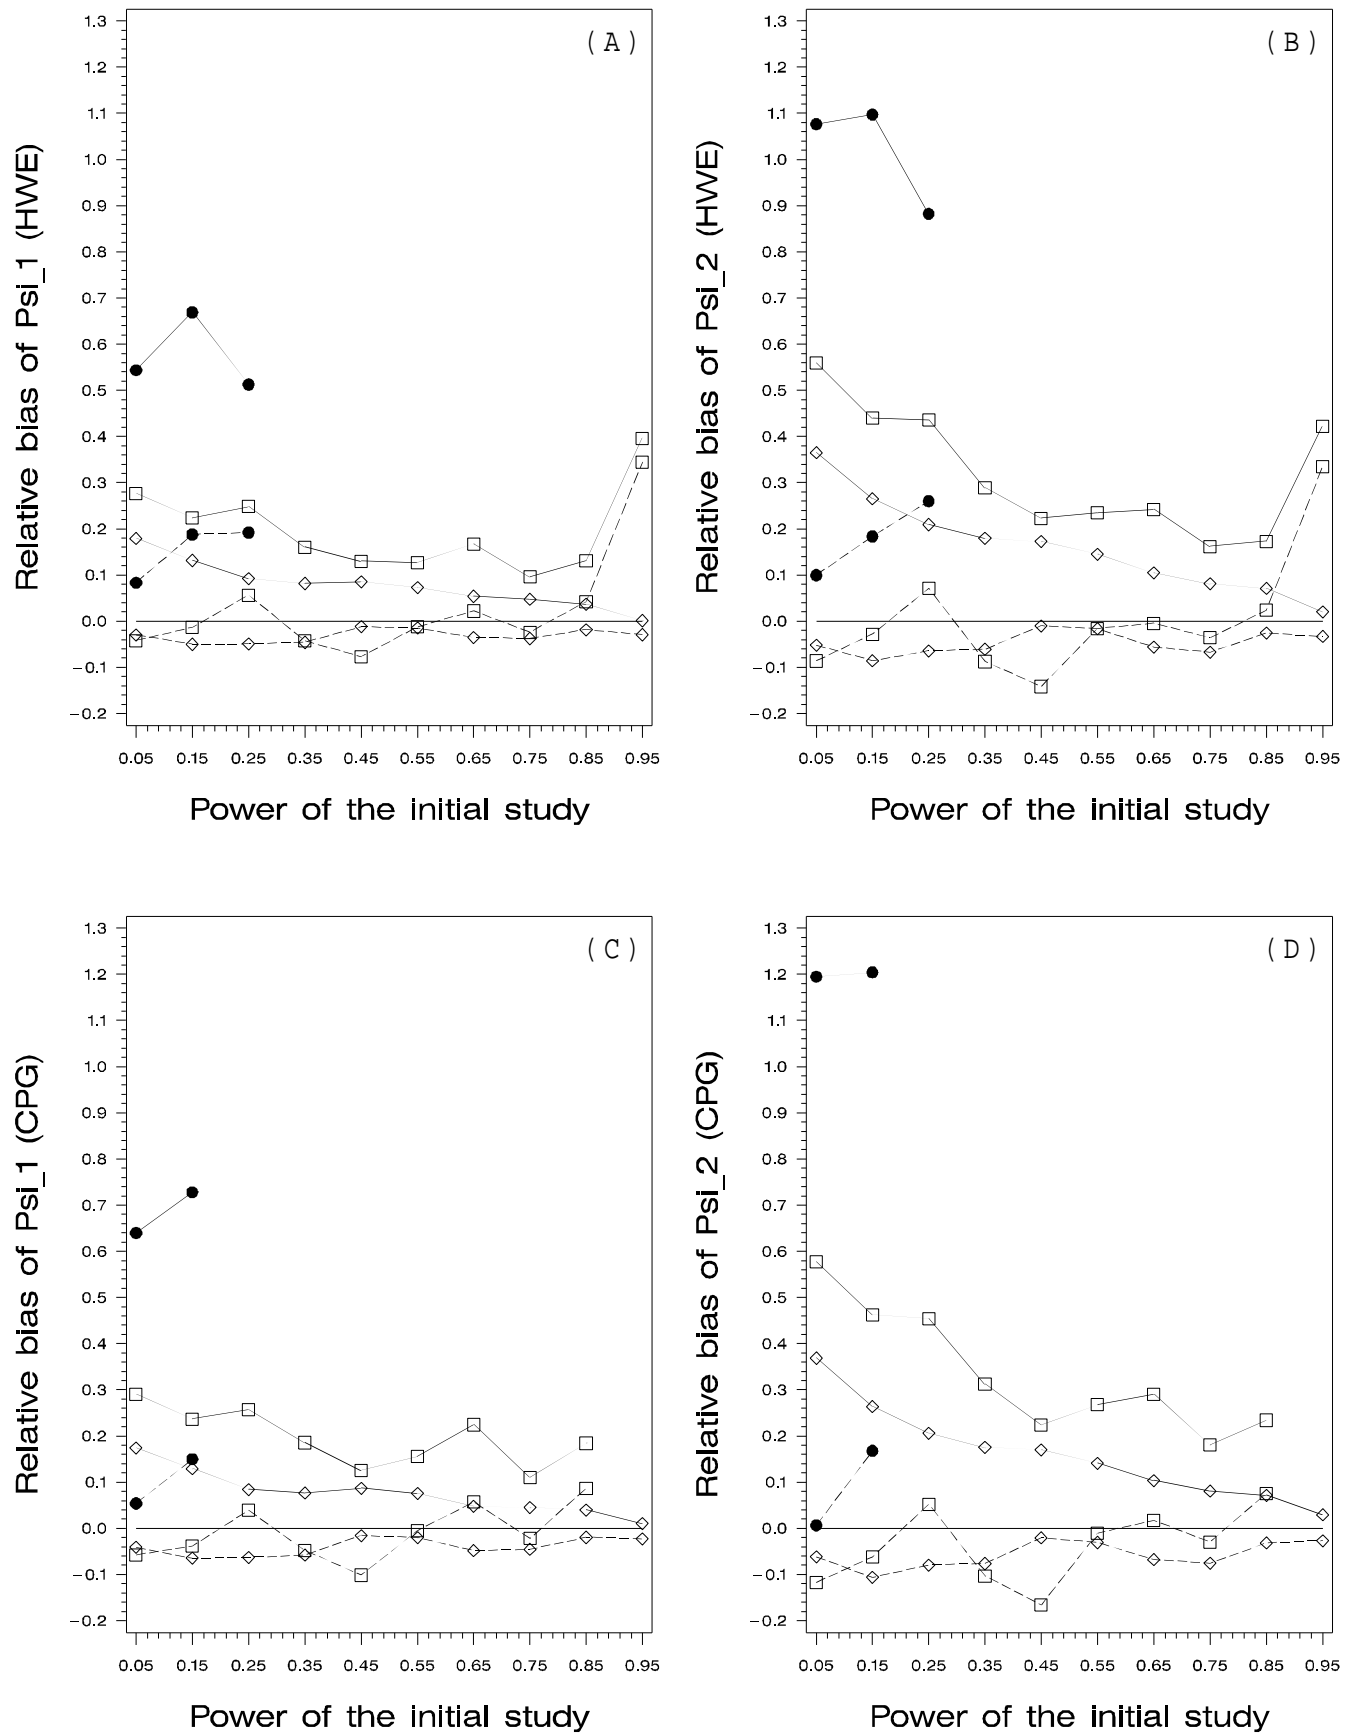

Supplement: Supplementary file 1 [file 1]
