# Supplementary material
Source: publisher figshare collection journal article supplement (https://karger.figshare.com/articles/dataset/_/5120383)
Supplement: Supplementary file 2 [file 1]

Table S1. Relative risks  $\psi_2$  resulting in a pre-specified power for given allele frequency  $p$ , genetic model, sample size  $n$  and type I error rate  $\alpha$ .

| $p$ | Model | $n$ | $\alpha$          | Power |      |      |      |      |      |      |      |      |       |
|-----|-------|-----|-------------------|-------|------|------|------|------|------|------|------|------|-------|
|     |       |     |                   | .05   | .15  | .25  | .35  | .45  | .55  | .65  | .75  | .85  | .95   |
| .20 | MUL   | 200 | $5 \cdot 10^{-2}$ | 1.00  | 1.37 | 1.56 | 1.71 | 1.86 | 2.02 | 2.20 | 2.41 | 2.69 | 3.24  |
|     |       |     | $10^{-3}$         | 1.76  | 2.15 | 2.41 | 2.64 | 2.87 | 3.10 | 3.36 | 3.66 | 4.08 | 4.86  |
|     |       |     | $10^{-6}$         | 2.99  | 3.62 | 4.04 | 4.41 | 4.77 | 5.14 | 5.55 | 6.03 | 6.69 | 7.92  |
|     |       | 400 | $5 \cdot 10^{-2}$ | 1.00  | 1.25 | 1.37 | 1.47 | 1.56 | 1.66 | 1.76 | 1.88 | 2.04 | 2.34  |
|     |       |     | $10^{-3}$         | 1.49  | 1.73 | 1.88 | 2.01 | 2.13 | 2.25 | 2.39 | 2.54 | 2.75 | 3.14  |
|     |       |     | $10^{-6}$         | 2.18  | 2.50 | 2.71 | 2.89 | 3.06 | 3.23 | 3.42 | 3.64 | 3.93 | 4.45  |
|     |       | 800 | $5 \cdot 10^{-2}$ | 1.00  | 1.17 | 1.25 | 1.31 | 1.37 | 1.43 | 1.50 | 1.57 | 1.67 | 1.84  |
|     |       |     | $10^{-3}$         | 1.33  | 1.47 | 1.57 | 1.64 | 1.72 | 1.79 | 1.87 | 1.95 | 2.07 | 2.28  |
|     |       |     | $10^{-6}$         | 1.74  | 1.93 | 2.04 | 2.14 | 2.23 | 2.32 | 2.42 | 2.53 | 2.68 | 2.94  |
|     | ADD   | 200 | $5 \cdot 10^{-2}$ | 1.00  | 1.36 | 1.52 | 1.66 | 1.79 | 1.92 | 2.07 | 2.24 | 2.46 | 2.88  |
|     |       |     | $10^{-3}$         | 1.70  | 2.03 | 2.25 | 2.43 | 2.61 | 2.79 | 2.99 | 3.22 | 3.54 | 4.13  |
|     |       |     | $10^{-6}$         | 2.72  | 3.22 | 3.55 | 3.83 | 4.11 | 4.39 | 4.70 | 5.07 | 5.58 | 6.55  |
|     |       | 400 | $5 \cdot 10^{-2}$ | 1.00  | 1.24 | 1.35 | 1.44 | 1.52 | 1.61 | 1.70 | 1.80 | 1.93 | 2.18  |
|     |       |     | $10^{-3}$         | 1.47  | 1.67 | 1.80 | 1.91 | 2.01 | 2.11 | 2.22 | 2.35 | 2.51 | 2.81  |
|     |       |     | $10^{-6}$         | 2.06  | 2.32 | 2.49 | 2.63 | 2.76 | 2.90 | 3.04 | 3.21 | 3.43 | 3.83  |
|     |       | 800 | $5 \cdot 10^{-2}$ | 1.00  | 1.17 | 1.24 | 1.30 | 1.36 | 1.41 | 1.47 | 1.53 | 1.62 | 1.77  |
|     |       |     | $10^{-3}$         | 1.32  | 1.45 | 1.53 | 1.60 | 1.66 | 1.72 | 1.79 | 1.86 | 1.96 | 2.13  |
|     |       |     | $10^{-6}$         | 1.69  | 1.84 | 1.94 | 2.02 | 2.09 | 2.17 | 2.25 | 2.34 | 2.45 | 2.66  |
|     | REC   | 200 | $5 \cdot 10^{-2}$ | 1.00  | 1.83 | 2.21 | 2.52 | 2.82 | 3.12 | 3.44 | 3.81 | 4.30 | 5.19  |
|     |       |     | $10^{-3}$         | 2.55  | 3.26 | 3.71 | 4.10 | 4.46 | 4.82 | 5.21 | 5.66 | 6.24 | 7.30  |
|     |       |     | $10^{-6}$         | 4.47  | 5.37 | 5.96 | 6.44 | 6.90 | 7.36 | 7.85 | 8.41 | 9.15 | 10.47 |
|     |       | 400 | $5 \cdot 10^{-2}$ | 1.00  | 1.58 | 1.84 | 2.05 | 2.24 | 2.44 | 2.64 | 2.88 | 3.19 | 3.74  |
|     |       |     | $10^{-3}$         | 2.07  | 2.53 | 2.82 | 3.06 | 3.29 | 3.51 | 3.75 | 4.02 | 4.37 | 4.99  |
|     |       |     | $10^{-6}$         | 3.30  | 3.85 | 4.19 | 4.47 | 4.74 | 5.00 | 5.28 | 5.60 | 6.01 | 6.73  |
|     |       | 800 | $5 \cdot 10^{-2}$ | 1.00  | 1.41 | 1.58 | 1.73 | 1.86 | 1.99 | 2.12 | 2.28 | 2.48 | 2.83  |
|     |       |     | $10^{-3}$         | 1.75  | 2.05 | 2.25 | 2.40 | 2.55 | 2.69 | 2.84 | 3.01 | 3.23 | 3.61  |
|     |       |     | $10^{-6}$         | 2.56  | 2.91 | 3.12 | 3.30 | 3.46 | 3.62 | 3.79 | 3.98 | 4.23 | 4.66  |
|     | DOM   | 200 | $5 \cdot 10^{-2}$ | 1.00  | 1.23 | 1.33 | 1.42 | 1.50 | 1.59 | 1.68 | 1.79 | 1.94 | 2.21  |
|     |       |     | $10^{-3}$         | 1.45  | 1.67 | 1.81 | 1.93 | 2.05 | 2.17 | 2.30 | 2.46 | 2.67 | 3.08  |
|     |       |     | $10^{-6}$         | 2.15  | 2.49 | 2.71 | 2.92 | 3.11 | 3.31 | 3.54 | 3.81 | 4.18 | 4.92  |
|     |       | 400 | $5 \cdot 10^{-2}$ | 1.00  | 1.15 | 1.22 | 1.28 | 1.33 | 1.39 | 1.44 | 1.51 | 1.59 | 1.75  |
|     |       |     | $10^{-3}$         | 1.30  | 1.43 | 1.51 | 1.58 | 1.65 | 1.71 | 1.79 | 1.87 | 1.98 | 2.17  |
|     |       |     | $10^{-6}$         | 1.69  | 1.86 | 1.97 | 2.07 | 2.16 | 2.24 | 2.34 | 2.45 | 2.60 | 2.87  |
|     |       | 800 | $5 \cdot 10^{-2}$ | 1.00  | 1.11 | 1.15 | 1.19 | 1.22 | 1.26 | 1.29 | 1.34 | 1.39 | 1.48  |
|     |       |     | $10^{-3}$         | 1.20  | 1.28 | 1.34 | 1.38 | 1.42 | 1.46 | 1.50 | 1.55 | 1.61 | 1.72  |
|     |       |     | $10^{-6}$         | 1.44  | 1.54 | 1.60 | 1.66 | 1.70 | 1.75 | 1.80 | 1.86 | 1.94 | 2.07  |
| .50 | MUL   | 200 | $5 \cdot 10^{-2}$ | 1.00  | 1.30 | 1.44 | 1.56 | 1.69 | 1.81 | 1.95 | 2.12 | 2.35 | 2.80  |
|     |       |     | $10^{-3}$         | 1.60  | 1.91 | 2.12 | 2.31 | 2.49 | 2.68 | 2.89 | 3.14 | 3.49 | 4.18  |

Table S1—Continued

| $p$ | Model | $n$               | $\alpha$          | Power |       |       |      |      |      |      |       |        |       |
|-----|-------|-------------------|-------------------|-------|-------|-------|------|------|------|------|-------|--------|-------|
|     |       |                   |                   | .05   | .15   | .25   | .35  | .45  | .55  | .65  | .75   | .85    | .95   |
|     | ADD   | 400               | $10^{-6}$         | 2.58  | 3.09  | 3.45  | 3.77 | 4.08 | 4.40 | 4.76 | 5.20  | 5.81   | 7.00  |
|     |       |                   | $5 \cdot 10^{-2}$ | 1.00  | 1.20  | 1.29  | 1.37 | 1.44 | 1.52 | 1.60 | 1.70  | 1.83   | 2.06  |
|     |       |                   | $10^{-3}$         | 1.39  | 1.57  | 1.69  | 1.80 | 1.89 | 1.99 | 2.10 | 2.23  | 2.40   | 2.71  |
|     |       | 800               | $10^{-6}$         | 1.93  | 2.19  | 2.36  | 2.51 | 2.64 | 2.79 | 2.94 | 3.12  | 3.37   | 3.82  |
|     |       |                   | $5 \cdot 10^{-2}$ | 1.00  | 1.14  | 1.20  | 1.25 | 1.30 | 1.34 | 1.39 | 1.45  | 1.53   | 1.67  |
|     |       |                   | $10^{-3}$         | 1.26  | 1.38  | 1.45  | 1.51 | 1.57 | 1.62 | 1.69 | 1.76  | 1.85   | 2.02  |
|     |       | 200               | $10^{-6}$         | 1.59  | 1.73  | 1.83  | 1.90 | 1.98 | 2.05 | 2.13 | 2.22  | 2.33   | 2.55  |
|     |       |                   | $5 \cdot 10^{-2}$ | 1.00  | 1.30  | 1.45  | 1.57 | 1.70 | 1.84 | 1.99 | 2.18  | 2.44   | 3.00  |
|     |       |                   | $10^{-3}$         | 1.61  | 1.95  | 2.19  | 2.40 | 2.62 | 2.86 | 3.14 | 3.50  | 4.03   | 5.23  |
|     |       | 400               | $10^{-6}$         | 2.76  | 3.48  | 4.03  | 4.58 | 5.16 | 5.85 | 6.72 | 7.96  | 10.13  | 17.22 |
|     |       |                   | $5 \cdot 10^{-2}$ | 1.00  | 1.20  | 1.30  | 1.37 | 1.45 | 1.53 | 1.61 | 1.71  | 1.85   | 2.11  |
|     |       |                   | $10^{-3}$         | 1.40  | 1.59  | 1.71  | 1.82 | 1.93 | 2.04 | 2.16 | 2.30  | 2.50   | 2.90  |
|     | REC   | 800               | $10^{-6}$         | 1.98  | 2.27  | 2.47  | 2.65 | 2.82 | 3.01 | 3.22 | 3.47  | 3.84   | 4.58  |
|     |       |                   | $5 \cdot 10^{-2}$ | 1.00  | 1.14  | 1.20  | 1.25 | 1.30 | 1.35 | 1.40 | 1.46  | 1.54   | 1.68  |
|     |       |                   | $10^{-3}$         | 1.26  | 1.38  | 1.45  | 1.52 | 1.58 | 1.64 | 1.70 | 1.78  | 1.88   | 2.06  |
|     |       | 200               | $10^{-6}$         | 1.60  | 1.75  | 1.85  | 1.94 | 2.02 | 2.10 | 2.19 | 2.29  | 2.43   | 2.69  |
|     |       |                   | $5 \cdot 10^{-2}$ | 1.00  | 1.27  | 1.40  | 1.50 | 1.60 | 1.69 | 1.80 | 1.92  | 2.09   | 2.38  |
|     |       |                   | $10^{-3}$         | 1.52  | 1.75  | 1.90  | 2.03 | 2.15 | 2.28 | 2.41 | 2.56  | 2.77   | 3.15  |
|     |       | 400               | $10^{-6}$         | 2.18  | 2.49  | 2.69  | 2.87 | 3.03 | 3.20 | 3.38 | 3.59  | 3.87   | 4.39  |
|     |       |                   | $5 \cdot 10^{-2}$ | 1.00  | 1.19  | 1.27  | 1.34 | 1.40 | 1.47 | 1.53 | 1.61  | 1.71   | 1.89  |
|     |       |                   | $10^{-3}$         | 1.35  | 1.50  | 1.60  | 1.68 | 1.75 | 1.82 | 1.90 | 1.99  | 2.11   | 2.32  |
|     |       | 800               | $10^{-6}$         | 1.76  | 1.95  | 2.06  | 2.16 | 2.25 | 2.34 | 2.44 | 2.55  | 2.69   | 2.95  |
|     |       |                   | $5 \cdot 10^{-2}$ | 1.00  | 1.13  | 1.19  | 1.23 | 1.28 | 1.32 | 1.36 | 1.41  | 1.48   | 1.59  |
|     |       |                   | $10^{-3}$         | 1.24  | 1.34  | 1.41  | 1.46 | 1.50 | 1.55 | 1.60 | 1.65  | 1.73   | 1.85  |
| DOM | 200   | $10^{-6}$         | 1.51              | 1.63  | 1.70  | 1.76  | 1.81 | 1.86 | 1.92 | 1.98 | 2.07  | 2.21   |       |
|     |       | $5 \cdot 10^{-2}$ | 1.01              | 1.33  | 1.51  | 1.68  | 1.85 | 2.05 | 2.29 | 2.62 | 3.15  | 4.56   |       |
|     |       | $10^{-3}$         | 1.76              | 2.29  | 2.74  | 3.21  | 3.76 | 4.46 | 5.47 | 7.19 | 11.38 | 103.43 |       |
|     | 400   | $10^{-6}$         | 4.53              | 8.40  | 15.61 | 43.44 | —    | —    | —    | —    | —     | —      |       |
|     |       | $5 \cdot 10^{-2}$ | 1.01              | 1.22  | 1.32  | 1.42  | 1.51 | 1.61 | 1.72 | 1.85 | 2.05  | 2.47   |       |
|     |       | $10^{-3}$         | 1.45              | 1.70  | 1.88  | 2.04  | 2.21 | 2.39 | 2.61 | 2.89 | 3.32  | 4.34   |       |
|     | 800   | $10^{-6}$         | 2.35              | 2.92  | 3.39  | 3.85  | 4.38 | 5.01 | 5.86 | 7.15 | 9.73  | 22.39  |       |
|     |       | $5 \cdot 10^{-2}$ | 1.00              | 1.15  | 1.21  | 1.27  | 1.32 | 1.38 | 1.44 | 1.51 | 1.61  | 1.80   |       |
|     |       | $10^{-3}$         | 1.29              | 1.43  | 1.52  | 1.60  | 1.68 | 1.76 | 1.85 | 1.95 | 2.10  | 2.40   |       |
|     |       | $10^{-6}$         | 1.72              | 1.94  | 2.10  | 2.23  | 2.37 | 2.51 | 2.67 | 2.88 | 3.17  | 3.79   |       |
